# Supplementary material for: Differences in chronic pain prevalence between men and women at mid-life: a systematic review protocol
Source: PubMed Central journal article supplement — BMJ Open. 2023 Apr 28;13(4):e065497. doi: 10.1136/bmjopen-2022-065497 (PMC10151927; doi:10.1136/bmjopen-2022-065497), 2023-04-28
Supplement: bmjopen-2022-065497.draft_revisions.pdf [file bmjopen-2022-065497.draft_revisions.pdf]

# BMJ Open

BMJ Open is committed to open peer review. As part of this commitment we make the peer review history of every article we publish publicly available.

When an article is published we post the peer reviewers' comments and the authors' responses online. We also post the versions of the paper that were used during peer review. These are the versions that the peer review comments apply to.

The versions of the paper that follow are the versions that were submitted during the peer review process. They are not the versions of record or the final published versions. They should not be cited or distributed as the published version of this manuscript.

BMJ Open is an open access journal and the full, final, typeset and author-corrected version of record of the manuscript is available on our site with no access controls, subscription charges or pay-per-view fees (<http://bmjopen.bmj.com>).

If you have any questions on BMJ Open's open peer review process please email [info.bmjopen@bmj.com](mailto:info.bmjopen@bmj.com)

# BMJ Open

## Differences in chronic pain prevalence between men and women at mid-life: a systematic review protocol

|                               |                                                                       |
|-------------------------------|-----------------------------------------------------------------------|
| Journal:                      | <i>BMJ Open</i>                                                       |
| Manuscript ID                 | bmjopen-2022-065497                                                   |
| Article Type:                 | Protocol                                                              |
| Date Submitted by the Author: | 09-Jun-2022                                                           |
| Complete List of Authors:     | Borra, Catherine; UCL<br>Hardy, Rebecca; Loughborough University; UCL |
| Keywords:                     | Pain management < ANAESTHETICS, EPIDEMIOLOGY, PUBLIC HEALTH           |
|                               |                                                                       |

SCHOLARONE™  
Manuscripts

1  
2  
3  
4 1 Differences in chronic pain prevalence  
5  
6  
7  
8  
9  
10  
11 2 between men and women at mid-life: a  
12  
13  
14  
15  
16  
17 3 systematic review protocol  
18  
19  
20  
21  
22  
23  
24  
25  
26  
27  
28  
29  
30  
31  
32  
33  
34  
35  
36  
37  
38  
39  
40  
41  
42  
43  
44  
45  
46  
47  
48  
49  
50  
51  
52  
53  
54  
55  
56  
57  
58  
59  
60

4  
5 Catherine Borra (PhD Student) (corresponding author)

6 Social Research Institute, Institute of Education

7 University College London

8 [Catherine.borra.19@ucl.ac.uk](mailto:Catherine.borra.19@ucl.ac.uk)

9 Contact address:

10 Social Research Institute (IoE),

11 55-59 Gordon Square,

12 London, UK.  
13

1  
2  
3  
4 14 Prof Rebecca Hardy

5  
6  
7 15 Social Research Institute, Institute of Education

8  
9  
10  
11 16 University College London, UK

12  
13  
14 17 [Rebecca.hardy@ucl.ac.uk](mailto:Rebecca.hardy@ucl.ac.uk)

15  
16  
17  
18 18

19  
20  
21 19 Word count: 1977

22  
23  
24  
25 20

26  
27  
28 21 **ABSTRACT**

29  
30  
31  
32  
33  
34 22

35  
36  
37  
38 23 **Introduction**

39  
40  
41  
42  
43 24 Epidemiological literature has revealed differences in chronic pain (CP) prevalence

44  
45  
46 25 in men and women. Women have been found to be more likely to develop CP

47  
48  
49  
50 26 compared to men at different points of the life-course, such as childhood and old

51  
52  
53 27 age. Less is known about differences in prevalence by sex during mid-life, when

54  
55  
56  
57 28 biological and physical changes may predispose to an earlier differentiation in CP

58  
59  
60

1  
2  
3  
4 29 distribution – for example due to the menopause. The aim of this study is to describe  
5  
6  
7 30 the prevalence of CP at midlife in men and women, and to identify how these  
8  
9  
10  
11 31 differences relate to prevalence rates in other periods of the life-course.  
12  
13

## 14 32 **Methods and analysis**

15  
16  
17  
18  
19 33 This systematic review follows PRISMA guidelines. An electronic search will identify  
20  
21  
22 34 appropriate studies in the following databases: MEDLINE, EMBASE, AMED and  
23  
24  
25  
26 35 PSYCHinfo. Two reviewers will independently screen each title and abstract. Studies  
27  
28  
29 36 eligible for data extraction will report estimates of CP prevalence, of prevalence for  
30  
31  
32  
33 37 each sex, and difference in prevalence between sexes. The findings will be reported  
34  
35  
36 38 in a narrative synthesis following the Social Research Council Methods Programme  
37  
38  
39 39 guidelines. A random effects meta-analysis will be conducted where the reviewers  
40  
41  
42  
43 40 can justify combining results.  
44  
45

## 46 41 **Ethics and dissemination**

47  
48  
49  
50  
51 42 This review will summarise the prevalence of CP in men and women at mid-life,  
52  
53  
54 43 based on existing evidence. It is expected that the results will identify gaps in  
55  
56  
57  
58  
59  
60

1  
2  
3  
4 44 knowledge and areas for further research. The review will be submitted for  
5  
6  
7 45 publication in topic specific journals and disseminated to professional networks.  
8  
9

## 10 46 **Strengths and limitations**

- 15 47 • This protocol offers a systematic approach to determining the prevalence of  
16  
17  
18 48 chronic pain in men and women at mid-life
- 22 49 • Additional analyses will explore prevalence by country, offering the  
23  
24  
25 50 opportunity for comparison
- 29 51 • Articles in English language only will be reviewed

## 33 52 34 35 36 37 53 **SYSTEMATIC REVIEW REGISTRATION**

41 54 PROSPERO: CRD42021295895

## 45 55 **KEYWORDS**

50 56 chronic pain; persistent pain; prevalence; sex; sex inequalities; gender inequalities  
51  
52  
53  
54  
55 57

1  
2  
3  
4  
5 58  
6  
7  
8  
9  
10  
11  
12  
13  
14 59  
15  
16  
17  
18  
19  
20  
21  
22 60  
23  
24  
25  
26  
27  
28 61 **BACKGROUND**  
29  
30  
31  
32 62  
33  
34  
35  
36 63 **Rationale**  
37  
38  
39  
40 64 Chronic pain (CP) – pain that lasts for longer than three months [1] – is becoming  
41  
42  
43 65 increasingly common [2–4], and threatens the physical, social and psychological  
44  
45  
46  
47 66 wellbeing of those who suffer with it [5–11]. While pain is a common experience,  
48  
49  
50  
51 67 there is inequality in CP distribution between men and women, with women being  
52  
53  
54 68 more likely to experience CP at various stages of the life-course [12–19]. There are  
55  
56  
57  
58 69 different hypotheses around the rationale for this inequality: one is sex-linked factors,  
59  
60

1  
2  
3  
4 70 like hormones and reproductive factors [20–22], another is it related to discrepancies  
5  
6  
7 71 in the social and cultural experiences between genders [23–25], leading to forms of  
8  
9  
10 72 gendered stress. While systematic reviews have attested to the unequal distribution  
11  
12  
13  
14 73 of CP in childhood and adolescence [26,27] and older age [13,17,18,28–32], the  
15  
16  
17 74 evidence is less clear about the prevalence of CP by sex at mid-life – a period with  
18  
19  
20  
21 75 distinct social and physical challenges where growth is balanced with decline [33],  
22  
23  
24 76 related to heightened socioeconomic responsibilities and physiological changes, like  
25  
26  
27  
28 77 the menopause. CP prevalence increases with age [19,34], yet some evidence  
29  
30  
31 78 shows that the burden of pain is increasing for increasingly younger cohorts [35]. The  
32  
33  
34  
35 79 mid-life is a potentially sensitive period that may provide an arena for prevention and  
36  
37  
38 80 management interventions to decrease the burden of CP later in life.  
39  
40  
41  
42 81  
43  
44  
45 82 Changes at mid-life may be associated with the emergence of CP, leading to  
46  
47  
48  
49 83 significant impact on a person’s ability to work [2,36] and lead a fulfilling life [37–39].  
50  
51  
52 84 The mid-life –the period variously defined between ages of 40-65 [33,40–44]- is a  
53  
54  
55  
56 85 period in which both sex-linked and gender factors converge, and can be a period of  
57  
58  
59 86 stress [33,45–50], at the same time as it is a time of social [33,51] and physical



1  
2  
3  
4 87 [3,33,46] change. For example, there is epidemiological evidence suggesting that  
5  
6  
7 88 women experience more musculoskeletal pain around the perimenopause compared  
8  
9  
10  
11 89 with pre-menopausal women, and  
12  
13  
14 90 that the pain persists into later life [31].  
15  
16

17 91  
18  
19  
20  
21 92 Previous systematic reviews have addressed the prevalence of CP by sex in the  
22  
23  
24 93 adult population spanning from 18 years to older age [16–19,34]. Mansfield *et al*  
25  
26  
27  
28 94 (2016), for example, identified that prevalence of chronic widespread pain was  
29  
30  
31 95 higher in women over 40, while Fayaz *et al* (2016) reported an increase in  
32  
33  
34  
35 96 prevalence of CP with age in the pooled sample. In summary, current systematic  
36  
37  
38 97 reviews of CP prevalence in adults either fail to differentiate between phases of  
39  
40  
41  
42 98 adulthood [17,18,29,34] or have not stratified results by sex at mid-life [15,52,53]. By  
43  
44  
45 99 comparing CP prevalence at mid-life by sex, this review aims at addressing this gap  
46  
47  
48  
49 100 in the literature.  
50

51  
52 101

## 53 54 55 56 102 **Objectives** 57 58 59 60

1  
2  
3  
4 103 We will therefore carry out a systematic review to update the work of previous  
5  
6  
7 104 reviews to investigate CP prevalence by sex in midlife in the general population. It  
8  
9  
10 105 aims at answering the following questions:

- 11  
12  
13  
14 106  
15  
16  
17 107 • What is the prevalence of CP in men and women in the general population at  
18  
19  
20  
21 108 mid-life?  
22  
23  
24 109 • What is the difference in CP prevalence between men and women in the  
25  
26  
27  
28 110 general population?  
29  
30  
31  
32 111

33  
34  
35 112 Heterogeneity in the results and variation across studies will be explored by  
36  
37  
38 113 geographic region, pain definition, and pain type. Geographic region has been  
39  
40  
41  
42 114 shown to be related to differences in pain prevalence in other systematic reviews of  
43  
44  
45 115 CP incidence, with higher prevalence in lower-income countries [16,34]. Similarly,  
46  
47  
48  
49 116 differences in pain definition (eg. the IASP definition of pain for 3 months or longer;  
50  
51  
52 117 pain duration for six months or longer; pain duration for 1 month or longer) have  
53  
54  
55  
56 118 shown to have an effect on CP prevalence estimates [54]. Lastly, the type of CP (eg.  
57  
58  
59 119 widespread chronic pain; fibromyalgia; chronic pelvic pain; chronic lower back pain)

1  
2  
3  
4 120 will represent further sources of heterogeneity since different conditions have  
5  
6  
7 121 different sex prevalence [55].  
8  
9

10  
11 122  
12  
13

14 123 Study quality will be assessed using a tool developed for prevalence studies by Hoy  
15  
16  
17 124 et al [56], and previously used in reviews of pain prevalence literature [57].  
18  
19

20  
21 125  
22  
23

## 24 25 126 **METHODS** 26 27

28  
29 127 This protocol is registered with the PROSPERO database and will be recorded using  
30  
31  
32 128 the Preferred Reporting Items for Systematic Reviews and Meta-Analyses Protocols  
33  
34  
35 129 (PRISMA-P) [58] (see Supplementary material). PROSPERO will be updated with  
36  
37  
38  
39 130 significant protocol amendments.  
40  
41

### 42 43 131 **Patient and public involvement** 44 45

46  
47 132 The research questions were determined with input from the patient and public  
48  
49  
50 133 involvement activities for a sister study.  
51  
52

53  
54 134  
55  
56

### 57 135 **Eligibility criteria** 58 59 60

1  
2  
3  
4 136 Studies will be included if they:

- 5  
6  
7 137 • Are original studies published in peer reviewed journals.  
8  
9  
10 138 • Examine the prevalence of CP in the 40-60 age group in men and women  
11  
12  
13  
14 139 separately.  
15  
16  
17 140 • Use samples selected from the general population.  
18  
19  
20  
21 141 • Use any clearly stated CP definition in line with the International Association  
22  
23  
24 142 for the Study of Pain (IASP) definition of pain lasting longer than three months  
25  
26  
27  
28 143 [59], including both local and widespread CP.  
29  
30  
31 144 • Clearly state the country in which data was collected.  
32  
33  
34  
35 145 • Use data from an observational study, such as prospective and retrospective  
36  
37  
38 146 cohorts, cross-sectional and case control studies.  
39  
40  
41  
42 147 • Are written in English.  
43  
44

45 148

46  
47  
48  
49 149 Studies will be excluded if they:

- 50  
51  
52 150 • Do not meet inclusion criteria.  
53  
54  
55  
56 151 • Are reviews, conference proceedings, editorials and letters.  
57  
58  
59 152 • Are samples of specific groups, eg. clinical samples, population minorities.  
60

- 1  
2  
3  
4 153      • Are specifically about neuropathic, diabetic or cancer pain.  
5  
6  
7 154  
8  
9

10  
11 155      **Information sources and search strategy**  
12  
13

14 156      An electronic search will identify appropriate studies. The selected databases are  
15  
16  
17  
18 157      MEDLINE, to be accessed through Web of Science as an interface; and EMBASE,  
19  
20  
21 158      AMED and PSYCHinfo to be accessed through Ovid as an interface. These  
22  
23  
24  
25 159      databases will be searched from earliest entries to 10 January 2022. The search  
26  
27  
28 160      strategy is based on CP terms, study terms, moderators, and limits. Different  
29  
30  
31  
32 161      techniques will be followed to ensure the search terms identify all relevant articles,  
33  
34  
35 162      and the search strategy will be piloted to make sure it is selecting relevant articles.  
36  
37  
38  
39 163      The search terms and various search tools used for the different databases are  
40  
41  
42 164      outlined in Table 1. The reference lists of fully eligible texts will also be screened to  
43  
44  
45  
46 165      identify potential inclusions.  
47  
48

49 166      *Table 1: Search strategy*  
50  
51 167

|                   | <i>MEDLINE (Web of Science)</i>                                  | <i>EMBASE + AMED + PSYCHinfo (Ovid)</i>                                                    |
|-------------------|------------------------------------------------------------------|--------------------------------------------------------------------------------------------|
| <i>Pain terms</i> | Chronic pain (MeSH Heading)<br>OR fibromyalgia (MeSH<br>Heading) | Chronic pain OR persistent pain OR<br>fibromyalgia (abstract)<br>NOT cancer OR diabetes OR |

|                    |                                                                                                                                                                                  |                                                                                                                                                                                                                                             |
|--------------------|----------------------------------------------------------------------------------------------------------------------------------------------------------------------------------|---------------------------------------------------------------------------------------------------------------------------------------------------------------------------------------------------------------------------------------------|
|                    | NOT<br>cancer OR diabetes OR<br>neuropath* OR paed* OR child*<br>OR adolescen*                                                                                                   | neuropath* OR paed* OR child* OR<br>adolescen* (abstract)                                                                                                                                                                                   |
| <i>Study terms</i> | epidemiology OR cohort stud*<br>OR cohort analys* OR cross<br>sectional stud* OR cross<br>sectional analys* OR<br>observational analys* OR<br>prevalence OR disease<br>frequency | Epidemiolog* OR cohort stud* OR<br>cohort analys* OR cross sectional<br>stud* OR cross-sectional* OR cross<br>sectional analys* OR observational<br>analys* OR prevalence OR disease<br>frequency NOT trial OR clinical trial<br>(abstract) |
| <i>Moderators</i>  | Women OR female<br>Men OR male                                                                                                                                                   | AND Male OR men (all fields)<br>AND Female OR women (all fields)                                                                                                                                                                            |
| <i>Limits</i>      | Excluding RCTs and clinical<br>studies/reviews<br>English language only<br>Journal articles only                                                                                 | English language only                                                                                                                                                                                                                       |

168 *Legend: MeSH terms are the Medical Subject Headings used for indexing articles in*  
 169 *MEDLINE; The truncation command \* is used to capture search terms which may*  
 170 *have alternative endings; The Boolean logic operator AND combines results from the*  
 171 *different search terms; The Boolean logic operator OR identifies results which*  
 172 *include at least one of the search terms.*

173

174

## 175 Study selection

1  
2  
3  
4 176 Duplicate search results will be removed from the final search list, which will be  
5  
6  
7 177 stored in Rayyan QCRI – a free systematic review software. The review team will  
8  
9  
10 178 consist of three researchers and two of these will independently screen each title  
11  
12  
13  
14 179 and abstract for eligibility using a template (Table 2). The full text of the remaining  
15  
16  
17 180 articles will be retrieved using the UCL findit@UCL linking service. Inaccessible  
18  
19  
20  
21 181 articles will be dealt with by contacting the authors directly. Each full text will be  
22  
23  
24 182 independently reviewed by two of the three researchers for final eligibility. Reasons  
25  
26  
27  
28 183 for exclusion will be recorded and documented. At each stage of screening, any  
29  
30  
31 184 differences between researchers will be resolved through discussion. Figure 1  
32  
33  
34  
35 185 represents a flow diagram of the study selection process.

36  
37  
38 186 *Table 2: Eligibility template*  
39  
40 187

| Article reference | Inclusion                                            |   |                                                                     |   |                                             |   |                                                                                                  |   |                                                       |   |                       |   | Exclusion          |   |                                |   |                                                         |   |                                                                         |   |                                       |   |
|-------------------|------------------------------------------------------|---|---------------------------------------------------------------------|---|---------------------------------------------|---|--------------------------------------------------------------------------------------------------|---|-------------------------------------------------------|---|-----------------------|---|--------------------|---|--------------------------------|---|---------------------------------------------------------|---|-------------------------------------------------------------------------|---|---------------------------------------|---|
|                   | Original studies published in peer reviewed journals |   | Prevalence of CP in the 40-60 age group in men and women separately |   | Sample selected from the general population |   | CP definition in line with the International Association for the Study of Pain (IASP) definition |   | Clearly state the country in which data was collected |   | Observational studies |   | Written in English |   | Do not meet inclusion criteria |   | Reviews, conference proceedings, editorials and letters |   | Samples of specific groups, eg. clinical samples, population minorities |   | Neuropathic, diabetic or cancer pain. |   |
|                   | Y                                                    | N | Y                                                                   | N | Y                                           | N | Y                                                                                                | N | Y                                                     | N | Y                     | N | Y                  | N | Y                              | N | Y                                                       | N | Y                                                                       | N | Y                                     | N |
|                   |                                                      |   |                                                                     |   |                                             |   |                                                                                                  |   |                                                       |   |                       |   |                    |   |                                |   |                                                         |   |                                                                         |   |                                       |   |

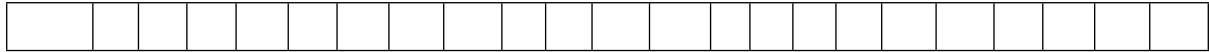

1  
2  
3  
4  
5  
6  
7  
8  
9  
10  
11  
12  
13  
14  
15  
16  
17  
18  
19  
20  
21  
22  
23  
24  
25  
26  
27  
28  
29  
30  
31  
32  
33  
34  
35  
36  
37  
38  
39  
40  
41  
42  
43  
44  
45  
46  
47  
48  
49  
50  
51  
52  
53  
54  
55  
56  
57  
58  
59  
60

188  
189  
190  
191  
192  
193  
194  
195  
196  
197  
198  
199  
200  
201  
202  
203

[FIGURE 1]

### Data extraction and quality assessment

Data extraction will be conducted by the three reviewers for the following data items: citation details (including year of publication and title), study design, country, sample size, CP definition, CP type, CP measurement, age measurement, sex measurement, estimates of CP, estimates of sex difference, estimates of CP prevalence for each sex.

A data extraction form (Table 3) will be used and data will be extracted for each paper by two independent reviewers, who will resolve any discrepancies by discussion and supervision of an experienced member of the team (RH).

*Table 3: Data extraction form  
Screening form:*

|                                         |  |
|-----------------------------------------|--|
| <b>Bibliographic reference details:</b> |  |
| First author                            |  |
| Title                                   |  |
| Journal                                 |  |



|                               |     |    |    |
|-------------------------------|-----|----|----|
| Volume                        |     |    |    |
| Year of publication           |     |    |    |
| Reviewer                      | CB  | JP | RH |
| Date                          |     |    |    |
| <b>Inclusion</b>              | Yes | No |    |
| <b>Reasons for exclusion:</b> |     |    |    |
| Ineligible population         | Yes | No |    |
| Ineligible study design       | Yes | No |    |
| Ineligible outcome            | Yes | No |    |
| Ineligible publication type   | Yes | No |    |
| Not in English                | Yes | No |    |
| Duplicate                     | Yes | No |    |
| Other                         |     |    |    |

204

205 *Data extraction form:*

206

|                                         |                   |                       |        |
|-----------------------------------------|-------------------|-----------------------|--------|
| <b>Bibliographic reference details:</b> |                   |                       |        |
| First author                            |                   |                       |        |
| Title                                   |                   |                       |        |
| Journal                                 |                   |                       |        |
| Volume                                  |                   |                       |        |
| Year of publication                     |                   |                       |        |
| Reviewer                                | CB                | JP                    | RH     |
| <b>Study characteristics:</b>           |                   |                       |        |
| Study design                            | Cohort study      | Cross-sectional study | Other: |
| Sample size                             |                   |                       |        |
| Country                                 |                   |                       |        |
| <b>Measurements:</b>                    |                   |                       |        |
| CP definition                           | IASP              | Other:                |        |
| CP measurement                          |                   |                       |        |
| Sex measurement                         | Self-reported sex | Self-reported gender  |        |
| Age measurement                         |                   |                       |        |

|                                                                                                                        |     |    |        |
|------------------------------------------------------------------------------------------------------------------------|-----|----|--------|
| <b>Outcomes:</b>                                                                                                       |     |    |        |
| Outcome type                                                                                                           | OR  | %  | Other: |
| Estimates of CP                                                                                                        |     |    |        |
| Estimates of sex difference                                                                                            |     |    |        |
| Estimates of CP prevalence for each sex                                                                                |     |    |        |
| <b>Risk of bias:</b>                                                                                                   |     |    |        |
| External validity:                                                                                                     |     |    |        |
| Was the study's target population a close representation of the national population in relation to relevant variables? | Yes | No |        |
| Was the sampling frame a true or close representation of the target population?                                        | Yes | No |        |
| Was some form of random selection used to select the sample, OR was a census undertaken?                               | Yes | No |        |
| Was the likelihood of nonresponse bias minimal?                                                                        | Yes | No |        |
| Internal                                                                                                               |     |    |        |
| Were data collected directly from the subjects (as opposed to a proxy)?                                                | Yes | No |        |
| Was an acceptable case definition used in the study?                                                                   | Yes | No |        |
| Was the study instrument that measured the parameter of interest shown to have validity and reliability?               | Yes | No |        |
| Internal validity:                                                                                                     |     |    |        |
| Was the same mode of data collection used for all subjects?                                                            | Yes | No |        |
| Was the length of the shortest prevalence period for the parameter of interest appropriate?                            | Yes | No |        |
| Were the numerator(s) and denominator(s) for the parameter of interest appropriate?                                    | Yes | No |        |

|                                                |     |          |      |
|------------------------------------------------|-----|----------|------|
| Summary item on the overall risk of study bias | Low | Moderate | High |
|------------------------------------------------|-----|----------|------|

207

208

209

210 The primary estimates of interest are CP prevalence by sex and an estimate of the

211 sex difference in pain (e.g. difference in prevalence or relative risk or odds ratio).

212

213 **Quality assessment**

214 Study quality will be addressed using a tool for risk of bias assessment for

215 prevalence studies which explores internal and external validity and scores studies

216 as low, moderate or high risk of bias [56]. This tool has high interrater agreement,

217 and it has previously been used in pain prevalence systematic reviews [57]. For this

218 review, two independent reviewers will use a checklist bases on this tool, which can

219 be found in Table 3.

220

221 **Synthesis**

222 **Narrative synthesis**

1  
2  
3  
4 223 A descriptive summary of studies will be provided using tables and addressing the  
5  
6  
7 224 following domains: primary outcomes, CP definition, CP type, sex/gender, age,  
8  
9  
10 225 geographic location (UN, WHO and HDI); and study quality assessment. It will  
11  
12  
13  
14 226 comment on the similarity of the methods used by the different studies and on the  
15  
16  
17  
18 227 possibility for meta-analysis.  
19  
20

21 228

22  
23  
24 229 Geographic region will be classified according to – the United Nations (UN) and  
25  
26  
27  
28 230 World Health Organisation (WHO) region classification [60][61], and the Human  
29  
30  
31 231 Development Index (HDI) for each country – a measures of population wealth [62],  
32  
33  
34  
35 232 which has previously used in CP prevalence reviews [16,34].  
36  
37

38 233

39  
40  
41  
42 234 The narrative synthesis will follow the Social Research Council Methods Programme  
43  
44  
45 235 guidelines [63], with a focus on identifying and exploring the prespecified sources of  
46  
47  
48  
49 236 heterogeneity.  
50

51  
52 237

53  
54  
55  
56 238 **Meta-analysis**  
57  
58  
59  
60

1  
2  
3  
4 239 A meta-analysis will be conducted if enough studies provide the relevance  
5  
6  
7 240 prevalence information by sex for the defined age group, and where the reviewers  
8  
9  
10 241 can justify combining results.  
11  
12  
13  
14 242  
15  
16  
17 243 A random effects meta-analysis will be used to combine estimates of CP prevalence  
18  
19  
20  
21 244 by sex and a measure of difference in CP prevalence between sexes. These will be  
22  
23  
24 245 presented in a Forest plot. The I<sup>2</sup> will be used to assess the extent of heterogeneity  
25  
26  
27  
28 246 in estimates. If there are enough studies included, sub-group analysis or meta-  
29  
30  
31 247 regression will be performed to establish the extent of heterogeneity related to (i)  
32  
33  
34  
35 248 geographic region (coded in three ways: UN, WHO and HDI), (ii) pain definition and  
36  
37  
38 249 (iii) pain type.  
39  
40  
41  
42 250 Publication bias will be assessed separately using a funnel plot. A sensitivity analysis  
43  
44  
45 251 excluding low quality studies will be carried out.  
46  
47  
48  
49 252  
50  
51

## 52 253 **Reporting**

53  
54  
55  
56  
57  
58  
59  
60

1  
2  
3  
4 254 The results of this systematic review will be shared in accordance with the Preferred  
5  
6  
7 255 Reporting Items for Systematic Reviews and Meta-Analyses (PRISMA) 2020  
8  
9  
10 256 guidelines [64].  
11  
12

13  
14 257

## 17 258 **DISCUSSION**

21 259 This study will review existing literature estimating CP prevalence and considers the  
22  
23  
24  
25 260 differences by sex/gender at mid-life, contributing to the literature about sex  
26  
27  
28 261 differences in CP prevalence. Heterogeneity in results will be assessed according to  
29  
30  
31  
32 262 geographic region, CP definition and type. The strengths and limitations will be  
33  
34  
35 263 considered, and measurements of sex (and gender) will be discussed in the context  
36  
37  
38  
39 264 of similar reviews. The results of this review will provide a significant step towards  
40  
41  
42 265 identifying CP inequalities in mid-life between the sexes and identify areas for further  
43  
44  
45  
46 266 research. A better understanding of the relationship of CP emergence, sex and the  
47  
48  
49 267 middle years in the general population may inform better early-prevention-and-  
50  
51  
52  
53 268 treatment strategies that tackle the distinct pathways for men and women.  
54  
55

56 269  
57  
58  
59  
60

1  
2  
3  
4 270 **LIST OF ABBREVIATIONS**

5  
6  
7  
8 271 CP: Chronic Pain

9  
10  
11  
12 272

13  
14  
15  
16 273 **DECLARATIONS**

17  
18  
19  
20  
21 274 **Ethics approval and consent to participate**

22  
23  
24  
25 275 Not applicable.

26  
27  
28  
29 276 **Consent for publication**

30  
31  
32  
33 277 Not applicable.

34  
35  
36  
37 278 **Availability of data and materials**

38  
39  
40  
41 279 Not applicable.

42  
43  
44  
45 280 **Competing interests**

46  
47  
48  
49 281 The authors declare that they have no competing interests.

50  
51  
52  
53 282 **Funding**

54  
55  
56  
57 283 Catherine Borra is supported by a PhD studentship funded by the Economic and

1  
2  
3  
4 284 Social Research Council (ESRC) and the Biotechnology and Biological Sciences

5  
6  
7 285 Research Council (BBSRC) (award reference: ES/T00200X/1). Rebecca Hardy is

8  
9  
10 286 Director of the CLOSER consortium, which is supported by the Economic and Social

11  
12  
13  
14 287 Research Council (ESRC) (award reference: ES/K000357/1).

15  
16  
17 288 Roles of funder: none.

18  
19  
20  
21 289 Guarantor: Catherine Borra

## 22 23 24 25 290 Authors' contributions

26  
27  
28  
29 291 CB is the main author of the draft of this manuscript. RH contributed with edits and

30  
31  
32  
33 292 methodological guidance, resulting in two further drafts. All authors read and

34  
35  
36  
37 293 approved the final manuscript.

## 38 39 40 294 Acknowledgements

41  
42  
43  
44 295 Dr. Nazlin Bhimani provided search term guidance which was instrumental in

45  
46  
47  
48 296 developing the search strategy for this protocol.

49  
50  
51 297

52  
53  
54  
55 298

## 56 57 58 299 REGISTRATION



1  
2  
3  
4 300  
5  
67 301 PROSPERO: CRD42021295895  
8  
910 302  
11  
1213 303  
14  
1516  
17  
18 304 REFERENCE LIST  
19  
2021 305  
22  
2324 306  
25  
2627  
28  
29 307 1 Treede RD, Rief W, Barke A, *et al.* Chronic pain as a symptom or a disease:  
30  
3132 308 The IASP Classification of Chronic Pain for the International Classification of  
33  
3435 309 Diseases (ICD-11). *Pain* 2019;**160**:19–27.  
36  
3738 310 doi:10.1097/j.pain.0000000000001384  
39  
4041  
42  
43 311 2 Dahlhamer J, Lucas J, Zelaya, C, *et al.* Prevalence of Chronic Pain and High-  
44  
4546 312 Impact Chronic Pain Among Adults — United States, 2016. *MMWR Morb*  
47  
4849 313 *Mortal Wkly Rep* 2018;**67**:1001–6. doi:10.15585/mmwr.mm6736a2  
50  
5152  
53 314 3 Case A, Deaton A, Stone AA. Decoding the mystery of American pain reveals  
54  
5556 315 a warning for the future. *Proc Natl Acad Sci U S A* 2020;**117**:24785–9.  
57  
58  
59  
60

- 1  
2  
3  
4 316 doi:10.1073/pnas.2012350117  
5  
6  
7 317 4 Zimmer Z, Zajacova A. Persistent, Consistent, and Extensive: The Trend of  
8  
9  
10 318 Increasing Pain Prevalence in Older Americans. *Journals Gerontol - Ser B*  
11  
12  
13  
14 319 *Psychol Sci Soc Sci* 2020;**75**:436–47. doi:10.1093/geronb/gbx162  
15  
16  
17 320 5 Brennan PL. Life Stressors: Elevations and Disparities Among Older Adults  
18  
19  
20  
21 321 with Pain. *Pain Med* 2020;**21**:2123–36. doi:10.1093/pm/pnaa189  
22  
23  
24 322 6 Phillips CJ. The Cost and Burden of Chronic Pain. *Rev Pain* 2009;**3**:2–5.  
25  
26  
27  
28 323 doi:10.1177/204946370900300102  
29  
30  
31 324 7 Yang Y, Grol-Prokopczyk H. Chronic Pain and Friendship Among Middle-Aged  
32  
33  
34  
35 325 and Older U.S. Adults. *Journals Gerontol Ser B* 2020;**XX**:1–12.  
36  
37  
38 326 doi:10.1093/geronb/gbaa185  
39  
40  
41  
42 327 8 Institute of Medicine (US) Committee on Advancing Pain Research, Care and  
43  
44  
45 328 E. Relieving Pain in America: A Blueprint for Transforming Prevention, Care,  
46  
47  
48  
49 329 Education, and Research. Washington (DC): 2011. doi:pmid: 22553896.  
50  
51  
52 330 9 Goldberg DS, McGee SJ. Pain as a global public health priority. *BMC Public*  
53  
54  
55  
56 331 *Health* 2011;**11**:770. doi:10.1186/1471-2458-11-770  
57  
58  
59 332 10 Breivik H, Eisenberg E, O'Brien T. The individual and societal burden of  
60

- 1  
2  
3  
4 333 chronic pain in Europe: The case for strategic prioritisation and action to  
5  
6  
7 334 improve knowledge and availability of appropriate care. *BMC Public Health*  
8  
9  
10 335 2013;**13**. doi:10.1186/1471-2458-13-1229  
11  
12  
13  
14 336 11 Yiengprugsawan V, Steptoe A. Impacts of persistent general and site-specific  
15  
16  
17 337 pain on activities of daily living and physical performance: A prospective  
18  
19  
20 338 analysis of the English Longitudinal Study of Ageing. *Geriatr Gerontol Int*  
21  
22  
23  
24 339 2018;**18**:1051–7. doi:10.1111/ggi.13304  
25  
26  
27  
28 340 12 Greenspan JD, Craft RM, LeResche L, *et al*. Studying sex and gender  
29  
30  
31 341 differences in pain and analgesia: A consensus report. *Pain* 2007;**132**:26–45.  
32  
33  
34 342 doi:10.1016/j.pain.2007.10.014  
35  
36  
37  
38 343 13 Larsson C, Hansson EE, Sundquist K, *et al*. Chronic pain in older adults:  
39  
40  
41 344 prevalence, incidence, and risk factors. *Scand J Rheumatol* 2017;**46**:317–25.  
42  
43  
44 345 doi:10.1080/03009742.2016.1218543  
45  
46  
47  
48 346 14 Mundal I, Gråwe RW, Bjørngaard JH, *et al*. Prevalence and long-term  
49  
50  
51 347 predictors of persistent chronic widespread pain in the general population in an  
52  
53  
54 348 11-year prospective study: The HUNT study. *BMC Musculoskelet Disord*  
55  
56  
57 349 2014;**15**. doi:10.1186/1471-2474-15-213  
58  
59  
60

- 1  
2  
3  
4 350 15 Souza JB De, Grossmann E, Perissinotti DiMN, *et al.* Prevalence of Chronic  
5  
6  
7 351 Pain, Treatments, Perception, and Interference on Life Activities: Brazilian  
8  
9  
10 352 Population-Based Survey. *Pain Res Manag* 2017;**2017**.  
11  
12  
13  
14 353 doi:10.1155/2017/4643830  
15  
16  
17 354 16 Andrews P, Steultjens M, Riskowski J. Chronic widespread pain prevalence in  
18  
19  
20  
21 355 the general population: A systematic review. *Eur J Pain (United Kingdom)*  
22  
23  
24 356 2018;**22**:5–18. doi:10.1002/ejp.1090  
25  
26  
27  
28 357 17 Jackson T, Thomas S, Stabile V, *et al.* Prevalence of chronic pain in low-  
29  
30  
31 358 income and middle-income countries: a systematic review and meta-analysis.  
32  
33  
34  
35 359 *Lancet* 2015;**385**:S10. doi:10.1016/s0140-6736(15)60805-4  
36  
37  
38 360 18 Øverås CK, Johansson MS, de Campos TF, *et al.* Distribution and prevalence  
39  
40  
41 361 of musculoskeletal pain co-occurring with persistent low back pain: a  
42  
43  
44  
45 362 systematic review. *BMC Musculoskelet Disord* 2021;**22**:1–14.  
46  
47  
48  
49 363 doi:10.1186/s12891-020-03893-z  
50  
51  
52 364 19 Fayaz A, Croft P, Langford RM, *et al.* Prevalence of chronic pain in the UK: a  
53  
54  
55 365 systematic review and meta-analysis of population studies. *BMJ Open*  
56  
57  
58  
59 366 2016;**6**:e010364. doi:10.1136/bmjopen-2015-010364  
60

- 1  
2  
3  
4 367 20 Vincent K, Warnaby C, Stagg CJ, *et al.* Brain imaging reveals that engagement  
5  
6  
7 368 of descending inhibitory pain pathways in healthy women in a low endogenous  
8  
9  
10 369 estradiol state varies with testosterone. *Pain* 2013;**154**:515–24.  
11  
12  
13  
14 370 doi:10.1016/j.pain.2012.11.016  
15  
16  
17 371 21 Macfarlane T V., Blinkhorn A, Worthington H V., *et al.* Sex hormonal factors  
18  
19  
20  
21 372 and chronic widespread pain: A population study among women.  
22  
23  
24 373 *Rheumatology* 2002;**41**:454–7. doi:10.1093/rheumatology/41.4.454  
25  
26  
27  
28 374 22 Dias RCA, Kulak Junior J, Ferreira da Costa EH, *et al.* Fibromyalgia, sleep  
29  
30  
31 375 disturbance and menopause: Is there a relationship? A literature review. *Int J*  
32  
33  
34 376 *Rheum Dis* 2019;**22**:1961–71. doi:10.1111/1756-185X.13713  
35  
36  
37  
38 377 23 Nijs J, George SZ, Clauw DJ, *et al.* Central sensitisation in chronic pain  
39  
40  
41  
42 378 conditions: latest discoveries and their potential for precision medicine. *Lancet*  
43  
44  
45 379 *Rheumatol* 2021;**;**383–92. doi:10.1016/s2665-9913(21)00032-1  
46  
47  
48  
49 380 24 Munro GB. Chronic Pain, Chronic Stress and Depression: Coincidence or  
50  
51  
52 381 Consequence? - Blackburn-Munro - 2001 - Journal of Neuroendocrinology -  
53  
54  
55 382 Wiley Online Library. *J...* 2001;**13**:1009–  
56  
57  
58  
59 383 23.<http://onlinelibrary.wiley.com/doi/10.1046/j.0007->  
60

- 1  
2  
3  
4 384 1331.2001.00727.x/full%5Cnpapers2://publication/uuid/D58A3567-D664-  
5  
6  
7 385 4D2D-8848-628253816778  
8  
9  
10 386 25 Hass-Cohen N, Clyde Findlay J. Pain, attachment, and meaning making:  
11  
12  
13  
14 387 Report on an art therapy relational neuroscience assessment protocol. *Arts*  
15  
16  
17 388 *Psychother* 2009;**36**:175–84. doi:10.1016/j.aip.2009.02.003  
18  
19  
20  
21 389 26 King S, Chambers CT, Huguet A, *et al.* The epidemiology of chronic pain in  
22  
23  
24 390 children and adolescents revisited: A systematic review. *Pain* 2011;**152**:2729–  
25  
26  
27  
28 391 38. doi:10.1016/j.pain.2011.07.016  
29  
30  
31 392 27 Silva C, Oliveira D, Pestana-Santos M, *et al.* Chronic non-cancer pain in  
32  
33  
34 393 adolescents: a narrative review. *Brazilian J Anesthesiol (English Ed)* Published  
35  
36  
37  
38 394 Online First: 2021. doi:10.1016/j.bjane.2021.04.033  
39  
40  
41 395 28 Wong CK, Mak RY, Kwok TS, *et al.* Prevalence, Incidence, and Factors  
42  
43  
44 396 Associated With Non-Specific Chronic Low Back Pain in Community-Dwelling  
45  
46  
47  
48 397 Older Adults Aged 60 Years and Older: A Systematic Review and Meta-  
49  
50  
51  
52 398 Analysis. *J Pain* 2021;**00**. doi:10.1016/j.jpain.2021.07.012  
53  
54  
55  
56 399 29 Mohamed Zaki LR, Hairi NN. A Systematic Review of the Prevalence and  
57  
58  
59 400 Measurement of Chronic Pain in Asian Adults. *Pain Manag Nurs* 2015;**16**:440–

- 1  
2  
3  
4 401 52. doi:10.1016/j.pmn.2014.08.012  
5  
6  
7 402 30 Fayaz A, Croft P, Langford RM, *et al.* Prevalence of chronic pain in the UK: A  
8  
9  
10 403 systematic review and meta-analysis of population studies. *BMJ Open* 2016;**6**.  
11  
12  
13  
14 404 doi:10.1136/bmjopen-2015-010364  
15  
16  
17 405 31 Lu CB, Liu PF, Zhou YS, *et al.* Musculoskeletal pain during the menopausal  
18  
19  
20  
21 406 transition: A systematic review and meta-analysis. *Neural Plast* 2020;**2020**.  
22  
23  
24 407 doi:10.1155/2020/8842110  
25  
26  
27  
28 408 32 Yang L, Peng W. Prevalence and Factors Associated With Body Pain: Results  
29  
30  
31 409 of a Nationally Representative Survey of 9,586 Chinese Adults Aged 60 and  
32  
33  
34  
35 410 Over. *Front Public Heal* 2021;**9**:1–7. doi:10.3389/fpubh.2021.634123  
36  
37  
38  
39 411 33 Lachman ME. Midlife as a pivotal in the life course: Balancing growth and  
40  
41  
42 412 decline at the crossroads of youth and old age. *Bone* 2011;**23**:1–7.  
43  
44  
45 413 doi:10.1177/0165025414533223.Midlife  
46  
47  
48  
49 414 34 Mansfield KE, Sim J, Jordan JL, *et al.* A systematic review and meta-analysis  
50  
51  
52 415 of the prevalence of chronic widespread pain in the general population. *Pain*  
53  
54  
55  
56 416 2016;**157**:55–64. doi:10.1002/ejp.1090  
57  
58  
59 417 35 Grol-Prokopczyk H. Sociodemographic disparities in chronic pain, based on  
60

- 1  
2  
3  
4 418 12-year longitudinal data. *Pain* 2017;**158**:313–22.  
5  
6  
7 419 doi:10.1097/j.pain.0000000000000762  
8  
9  
10 420 36 Zelaya CE, Dahlhamer JM, Lucas JW, *et al.* Chronic Pain and High-impact  
11  
12  
13  
14 421 Chronic Pain Among U.S. Adults, 2019. *NCHS Data Brief* 2020;:1–8.  
15  
16  
17 422 37 Rovner GS, Sunnerhagen KS, Björkdahl A, *et al.* Chronic pain and sex-  
18  
19  
20  
21 423 differences; Women accept and move, while men feel blue. *PLoS One*  
22  
23  
24 424 2017;**12**:1–12. doi:10.1371/journal.pone.0175737  
25  
26  
27  
28 425 38 Patel K, Dansie E, Guralnik J, *et al.* Prevalence and impact of pain among  
29  
30  
31 426 older adults in the United States: findings from the National Health and aging  
32  
33  
34  
35 427 trends study. *J Pain* 2013;**14**:S12. doi:10.1016/j.jpain.2013.01.057  
36  
37  
38  
39 428 39 Blyth FM, Noguchi N. Chronic musculoskeletal pain and its impact on older  
40  
41  
42 429 people. *Best Pract Res Clin Rheumatol* 2017;**31**:160–8.  
43  
44  
45 430 doi:10.1016/j.berh.2017.10.004  
46  
47  
48  
49 431 40 Zhang Z, Hayward MD. Gender, the marital life course, and cardiovascular  
50  
51  
52 432 disease in late midlife. *J Marriage Fam* 2006;**68**:639–57. doi:10.1111/j.1741-  
53  
54  
55 433 3737.2006.00280.x  
56  
57  
58  
59 434 41 Keenan K, Ploubidis GB, Silverwood RJ, *et al.* Life-course partnership history  
60



- 1  
2  
3  
4 435 and midlife health behaviours in a population-based birth cohort. *J Epidemiol*  
5  
6  
7 436 *Community Health* 2017;**71**:232–8. doi:10.1136/jech-2015-207051  
8  
9  
10  
11 437 42 Levinson DJ. A Conception of Adult Development. *Am Psychol* 1986;**41**:3–13.  
12  
13  
14 438 doi:10.1037/0003-066X.41.1.3  
15  
16  
17 439 43 Livingston G, Huntley J, Sommerlad A, *et al*. Dementia prevention,  
18  
19  
20  
21 440 intervention, and care: 2020 report of the Lancet Commission. *Lancet*  
22  
23  
24 441 2020;**396**:413–46. doi:10.1016/S0140-6736(20)30367-6  
25  
26  
27  
28 442 44 Lee J, Gutsche T. 2011 Harmonization of Cross - National Studies of Aging  
29  
30  
31 443 Meeting National Institute on Aging Prepared by : 2011.  
32  
33  
34  
35 444 45 Sievert LL, Jaff N, Woods NF. Stress and midlife women's health. *Women's*  
36  
37  
38 445 *Midlife Heal* 2018;**4**:1–5. doi:10.1186/s40695-018-0034-1  
39  
40  
41  
42 446 46 Thomas AJ, Mitchell ES, Woods NF. The challenges of midlife women: themes  
43  
44  
45 447 from the Seattle midlife Women's health study. *Women's Midlife Heal*  
46  
47  
48 448 2018;**4**:1–10. doi:10.1186/s40695-018-0039-9  
49  
50  
51  
52 449 47 Thomas AJ, Mitchell ES, Woods NF. Undesirable stressful life events, impact,  
53  
54  
55 450 and correlates during midlife: observations from the Seattle midlife women's  
56  
57  
58 451 health study. *Women's Midlife Heal* 2019;**5**:1–13. doi:10.1186/s40695-018-

- 1  
2  
3  
4 452 0045-y  
5  
6  
7 453 48 Hardy C, Thorne E, Griffiths A, *et al.* Work outcomes in midlife women: the  
8  
9  
10 454 impact of menopause, work stress and working environment. *Women's Midlife*  
11  
12  
13  
14 455 *Heal* 2018;4:1–8. doi:10.1186/s40695-018-0036-z  
15  
16  
17 456 49 Hedgeman E, Hasson RE, Karvonen-Gutierrez CA, *et al.* Perceived stress  
18  
19  
20  
21 457 across the midlife: longitudinal changes among a diverse sample of women,  
22  
23  
24 458 the Study of Women's health Across the Nation (SWAN). *Women's Midlife*  
25  
26  
27  
28 459 *Heal* 2018;4:1–11. doi:10.1186/s40695-018-0032-3  
29  
30  
31 460 50 Dolsen MR, Crosswell AD, Prather AA. Links Between Stress, Sleep, and  
32  
33  
34  
35 461 Inflammation: Are there Sex Differences? *Curr Psychiatry Rep* 2019;21:4–9.  
36  
37  
38 462 doi:10.1007/s11920-019-0993-4  
39  
40  
41  
42 463 51 McGinnis D. Resilience, Life Events, and Well-Being During Midlife: Examining  
43  
44  
45 464 Resilience Subgroups. *J Adult Dev* 2018;25:198–221. doi:10.1007/s10804-  
46  
47  
48 465 018-9288-y  
49  
50  
51  
52 466 52 Sá KN, Moreira L, Baptista AF, *et al.* Prevalence of chronic pain in developing  
53  
54  
55  
56 467 countries: systematic review and meta-analysis. *PAIN Reports* 2019;4:e779.  
57  
58  
59 468 doi:10.1097/pr9.0000000000000779  
60

- 1  
2  
3  
4 469 53 Picavet HSJ, Monique Verschuren WM, Groot L, *et al.* Pain over the adult life  
5  
6  
7 470 course: 15-year pain trajectories—The Doetinchem Cohort Study. *Eur J Pain*  
8  
9  
10 471 (*United Kingdom*) 2019;**23**:1723–32. doi:10.1002/ejp.1450  
11  
12  
13  
14 472 54 Steingrímssdóttir ÓA, Landmark T, Macfarlane GJ, *et al.* Defining chronic pain  
15  
16  
17 473 in epidemiological studies: A systematic review and meta-analysis. *Pain*  
18  
19  
20 474 2017;**158**:2092–107. doi:10.1097/j.pain.0000000000001009  
21  
22  
23  
24 475 55 LeResche L, Mancl LA, Drangsholt MT, *et al.* Relationship of pain and  
25  
26  
27 476 symptoms to pubertal development in adolescents. *Pain* 2005;**118**:201–9.  
28  
29  
30 477 doi:10.1016/j.pain.2005.08.011  
31  
32  
33  
34 478 56 Hoy D, Brooks P, Woolf A, *et al.* Assessing risk of bias in prevalence studies:  
35  
36  
37 479 Modification of an existing tool and evidence of interrater agreement. *J Clin*  
38  
39  
40 480 *Epidemiol* 2012;**65**:934–9. doi:10.1016/j.jclinepi.2011.11.014  
41  
42  
43  
44 481 57 Hoy D, Bain C, Williams G, *et al.* A systematic review of the global prevalence  
45  
46  
47 482 of low back pain. *Arthritis Rheum* 2012;**64**:2028–37. doi:10.1002/art.34347  
48  
49  
50  
51 483 58 Moher D, Shamseer L, Clarke M, *et al.* Preferred reporting items for systematic  
52  
53  
54 484 review and meta-analysis protocols (PRISMA-P) 2015 statement. *Syst Rev*  
55  
56  
57 485 2015;**4**:1. doi:10.1186/2046-4053-4-1  
58  
59  
60

1  
2  
3  
4 486 59 Treede R-D, Rief W, Barke A, *et al*. A classification of chronic pain for ICD-11.

5  
6  
7 487 *Pain* 2015;**156**:1003–7.

8  
9  
10 488 60 Statistics Division of the United Nations Secretariat. Standard country or area

11  
12  
13  
14 489 codes for statistical use (M49). 2018.

15  
16  
17 490 61 World Health Organisation. WHO regional offices. 2017.

18  
19  
20 491 62 HDR. Human development reports. 2016.

21  
22  
23 492 63 Popay JA, Sowden A, Petticrew M, *et al*. Guidance on the conduct of narrative

24  
25  
26 493 synthesis in systematic reviews. 2006.<https://www.lancaster.ac.uk/>

27  
28  
29 494 [shm/research/nssr/research/d](https://www.lancaster.ac.uk/shm/research/nssr/research/d)

30  
31  
32 495 64 Page MJ, McKenzie JE, Bossuyt PM, *et al*. The PRISMA 2020 statement: An

33  
34  
35 496 updated guideline for reporting systematic reviews. *Int J Surg* 2021;**88**:1–11.

36  
37  
38 497 [doi:10.1016/j.ijisu.2021.105906](https://doi.org/10.1016/j.ijisu.2021.105906)

39  
40  
41 498

42  
43  
44 499

45  
46  
47 500

48  
49  
50  
51  
52  
53  
54  
55  
56 501 **Additional materials**

57  
58  
59  
60

1  
2  
3  
4 502 Parts of this manuscript refer to the following additional material, which will be  
5  
6  
7 503 presented on submission:  
8  
9

10  
11 504  
12

| Material type                          | File name                    |
|----------------------------------------|------------------------------|
| Figure 1: Search Strategy Flow Diagram | Figure 1_search strategy.pfd |
| Supplementary material                 | Supplementary material.pfd   |

13  
14  
15  
16  
17  
18  
19  
20  
21  
22  
23  
24 505  
25  
26  
27

28 506  
29  
30  
31  
32  
33  
34  
35  
36  
37  
38  
39  
40  
41  
42  
43  
44  
45  
46  
47  
48  
49  
50  
51  
52  
53  
54  
55  
56  
57  
58  
59  
60

Figure 1: Study selection strategy – PRISMA 2020 Flow Diagram  
 From: Chronic pain prevalence in men and women in mid-life: a systematic review.

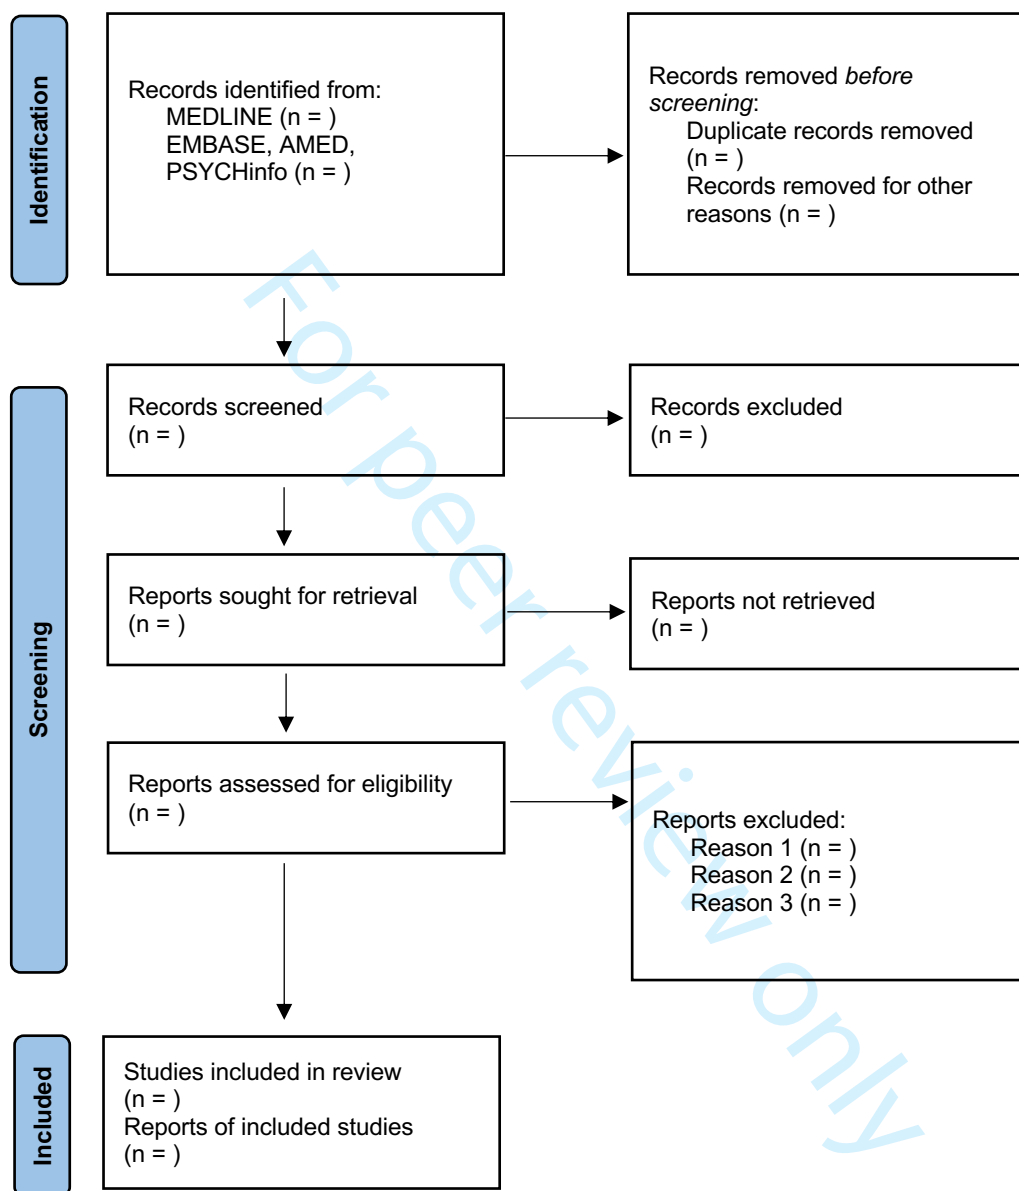

From: Page MJ, McKenzie JE, Bossuyt PM, Boutron I, Hoffmann TC, Mulrow CD, et al. The PRISMA 2020 statement: an updated guideline for reporting systematic reviews. *BMJ* 2021;372:n71. doi: 10.1136/bmj.n71

**PRISMA-P (Preferred Reporting Items for Systematic review and Meta-Analysis Protocols) 2015 checklist: recommended items to address in a systematic review protocol\***

This checklist has been adapted for use with the systematic review protocol submissions to BioMed Central Journals from Table 3 in: Moher D, Shamseer L, Clarke M, Ghersi D, Liberati A, Petticrew M, et al. Preferred reporting items for systematic review and meta-analysis protocols (PRISMA-P) 2015 statement. Syst Rev [Internet]. 2015;4 (1):1. Available from: <https://doi.org/10.1186/2046-4053-4-1>

It was adapted following guidelines from the editors-in-chief of *Systematic Reviews*: Moher D, Stewart L, Shekelle P. Implementing PRISMA-P: Recommendations for prospective authors. Syst Rev [Internet]. 2016;5(1):4–5. Available from: <http://dx.doi.org/10.1186/s13643-016-0191-y>

| Section and topic                 | Item No | Checklist item                                                                                                                            | Information reported (Y/N) | Line number(s) |
|-----------------------------------|---------|-------------------------------------------------------------------------------------------------------------------------------------------|----------------------------|----------------|
| <b>ADMINISTRATIVE INFORMATION</b> |         |                                                                                                                                           |                            |                |
| Title:                            |         |                                                                                                                                           |                            |                |
| Identification                    | 1a      | Identify the report as a protocol of a systematic review                                                                                  | Y                          | 1-3            |
| Update                            | 1b      | If the protocol is for an update of a previous systematic review, identify as such                                                        | N/A                        | N/A            |
| Registration                      | 2       | If registered, provide the name of the registry (such as PROSPERO) and registration number                                                | Y                          | 53             |
| Authors:                          |         |                                                                                                                                           |                            |                |
| Contact                           | 3a      | Provide name, institutional affiliation, e-mail address of all protocol authors; provide physical mailing address of corresponding author | Y                          | 5-17           |
| Contributions                     | 3b      | Describe contributions of protocol authors and identify the guarantor of the review                                                       | Y                          | 276-279        |
| Amendments                        | 4       | If the protocol represents an amendment of a previously completed or published protocol,                                                  | NA                         | N/A            |

|                           |    |                                                                                                                                                                                                                               |   |         |
|---------------------------|----|-------------------------------------------------------------------------------------------------------------------------------------------------------------------------------------------------------------------------------|---|---------|
|                           |    | identify as such and list changes; otherwise, state plan for documenting important protocol amendments                                                                                                                        |   |         |
| Support:                  |    |                                                                                                                                                                                                                               |   |         |
| Sources                   | 5a | Indicate sources of financial or other support for the review                                                                                                                                                                 | Y | 268-273 |
| Sponsor                   | 5b | Provide name for the review funder and/or sponsor                                                                                                                                                                             | Y | 268-273 |
| Role of sponsor or funder | 5c | Describe roles of funder(s), sponsor(s), and/or institution(s), if any, in developing the protocol                                                                                                                            | Y | 274     |
| <b>INTRODUCTION</b>       |    |                                                                                                                                                                                                                               |   |         |
| Rationale                 | 6  | Describe the rationale for the review in the context of what is already known                                                                                                                                                 | Y | 62-96   |
| Objectives                | 7  | Provide an explicit statement of the question(s) the review will address with reference to participants, interventions, comparators, and outcomes (PICO)                                                                      | Y | 98-119  |
| <b>METHODS</b>            |    |                                                                                                                                                                                                                               |   |         |
| Eligibility criteria      | 8  | Specify the study characteristics (such as PICO, study design, setting, time frame) and report characteristics (such as years considered, language, publication status) to be used as criteria for eligibility for the review | Y | 127-147 |
| Information sources       | 9  | Describe all intended information sources (such as electronic databases, contact with study authors, trial registers or other grey literature sources) with planned dates of coverage                                         | Y | 169-178 |
| Search strategy           | 10 | Present draft of search strategy to be used for at least one electronic database, including planned limits, such that it could be repeated                                                                                    | Y | 149-165 |
| Study records:            |    |                                                                                                                                                                                                                               |   |         |



1  
2  
3  
4  
5  
6  
7  
8  
9  
10  
11  
12  
13  
14  
15  
16  
17  
18  
19  
20  
21  
22  
23  
24  
25  
26  
27  
28  
29  
30  
31  
32  
33  
34  
35  
36  
37  
38  
39  
40  
41  
42  
43  
44  
45  
46

|                                    |     |                                                                                                                                                                                                                                                           |   |         |
|------------------------------------|-----|-----------------------------------------------------------------------------------------------------------------------------------------------------------------------------------------------------------------------------------------------------------|---|---------|
| Data management                    | 11a | Describe the mechanism(s) that will be used to manage records and data throughout the review                                                                                                                                                              | Y | 168-179 |
| Selection process                  | 11b | State the process that will be used for selecting studies (such as two independent reviewers) through each phase of the review (that is, screening, eligibility and inclusion in meta-analysis)                                                           | Y | 168-179 |
| Data collection process            | 11c | Describe planned method of extracting data from reports (such as piloting forms, done independently, in duplicate), any processes for obtaining and confirming data from investigators                                                                    | Y | 183-209 |
| Data items                         | 12  | List and define all variables for which data will be sought (such as PICO items, funding sources), any pre-planned data assumptions and simplifications                                                                                                   | Y | 192-198 |
| Outcomes and prioritization        | 13  | List and define all outcomes for which data will be sought, including prioritization of main and additional outcomes, with rationale                                                                                                                      | Y | 183-202 |
| Risk of bias in individual studies | 14  | Describe anticipated methods for assessing risk of bias of individual studies, including whether this will be done at the outcome or study level, or both; state how this information will be used in data synthesis                                      | Y | 204-209 |
| Data synthesis                     | 15a | Describe criteria under which study data will be quantitatively synthesised                                                                                                                                                                               | Y | 227-239 |
|                                    | 15b | If data are appropriate for quantitative synthesis, describe planned summary measures, methods of handling data and methods of combining data from studies, including any planned exploration of consistency (such as I <sup>2</sup> , Kendall's $\tau$ ) | Y | 227-239 |
|                                    | 15c | Describe any proposed additional analyses (such as sensitivity or subgroup analyses, meta-regression)                                                                                                                                                     | Y | 234-239 |
|                                    | 15d | If quantitative synthesis is not appropriate, describe the type of summary planned                                                                                                                                                                        | Y | 212-225 |

|   |                                         |    |                                                                                                                                     |              |
|---|-----------------------------------------|----|-------------------------------------------------------------------------------------------------------------------------------------|--------------|
| 1 |                                         |    |                                                                                                                                     |              |
| 2 |                                         |    |                                                                                                                                     |              |
| 3 | Meta-bias(es)                           | 16 | Specify any planned assessment of meta-bias(es)<br>(such as publication bias across studies, selective<br>reporting within studies) | Y<br>238-239 |
| 4 |                                         |    |                                                                                                                                     |              |
| 5 |                                         |    |                                                                                                                                     |              |
| 6 | Confidence in<br>cumulative<br>evidence | 17 | Describe how the strength of the body of<br>evidence will be assessed (such as GRADE)                                               | Y<br>204-209 |
| 7 |                                         |    |                                                                                                                                     |              |
| 8 |                                         |    |                                                                                                                                     |              |
| 9 |                                         |    |                                                                                                                                     |              |

10 **\* The copyright for PRISMA-P (including checklist) is held by the PRISMA-P Group and is distributed under a Creative Commons Attribution Licence 4.0.**

11  
12 *From: Shamseer L, Moher D, Clarke M, Ghersi D, Liberati A, Petticrew M, Shekelle P, Stewart L, PRISMA-P Group. Preferred reporting items for systematic review and meta-*  
13 *analysis protocols (PRISMA-P) 2015: elaboration and explanation. BMJ. 2015 Jan 2;349(jan02 1):g7647.*  
14  
15  
16  
17  
18  
19  
20  
21  
22  
23  
24  
25  
26  
27  
28  
29  
30  
31  
32  
33  
34  
35  
36  
37  
38  
39  
40  
41  
42  
43  
44  
45  
46

# BMJ Open

## Differences in chronic pain prevalence between men and women at mid-life: a systematic review protocol

|                                 |                                                                       |
|---------------------------------|-----------------------------------------------------------------------|
| Journal:                        | <i>BMJ Open</i>                                                       |
| Manuscript ID                   | bmjopen-2022-065497.R1                                                |
| Article Type:                   | Protocol                                                              |
| Date Submitted by the Author:   | 03-Mar-2023                                                           |
| Complete List of Authors:       | Borra, Catherine; UCL<br>Hardy, Rebecca; Loughborough University; UCL |
| <b>Primary Subject Heading</b>: | Epidemiology                                                          |
| Secondary Subject Heading:      | Epidemiology, Global health, Public health, Sociology, Anaesthesia    |
| Keywords:                       | Pain management < ANAESTHETICS, EPIDEMIOLOGY, PUBLIC HEALTH           |
|                                 |                                                                       |

SCHOLARONE™  
Manuscripts

1  
2  
3  
4 1 Differences in chronic pain prevalence  
5  
6  
7  
8  
9  
10  
11 2 between men and women at mid-life: a  
12  
13  
14  
15  
16  
17 3 systematic review protocol  
18  
19  
20  
21  
22  
23  
24  
25  
26  
27  
28  
29  
30  
31  
32  
33  
34  
35  
36  
37  
38  
39  
40  
41  
42  
43  
44  
45  
46  
47  
48  
49  
50  
51  
52  
53  
54  
55  
56  
57  
58  
59  
60

4  
5 Catherine Borra (PhD Student) (corresponding author)

6 Social Research Institute, Institute of Education

7 University College London

8 [Catherine.borra.19@ucl.ac.uk](mailto:Catherine.borra.19@ucl.ac.uk)

9 Contact address:

10 Social Research Institute (IoE),

11 55-59 Gordon Square,

12 London, UK.  
13

1  
2  
3  
4 14 Prof Rebecca Hardy  
5  
6  
7 15 School of Sport, Exercise and Health Sciences,  
8  
9  
10 16 Loughborough University, UK  
11  
12  
13  
14 17 Social Research Institute, Institute of Education  
15  
16  
17 18 University College London, UK  
18  
19  
20  
21 19 R.J.Hardy@lboro.ac.uk  
22  
23  
24  
25  
26  
27  
28 21 Word count: 2024  
29  
30  
31  
32  
33  
34  
35  
36  
37  
38  
39  
40  
41  
42  
43  
44  
45  
46  
47  
48  
49  
50  
51  
52  
53  
54  
55  
56  
57  
58  
59  
60

## 23 **ABSTRACT**

### 25 **Introduction**

26 Epidemiological literature shows differences in chronic pain (CP) prevalence in men  
51  
52  
53 27 and women. Women have been found to be more likely to develop CP at different  
54  
55  
56  
57 28 points of the life-course, such as childhood and old age. Less is known about the

1  
2  
3  
4 29 prevalence of CP by sex and the difference in prevalence during mid-life, when  
5  
6  
7 30 changes may predispose to an earlier differentiation in CP distribution. The aim of  
8  
9  
10 31 this study is to describe the difference in prevalence of CP at mid-life (ages 40-60) in  
11  
12  
13  
14 32 men and women in the general population.  
15  
16

## 17 33 **Methods and analysis**

18  
19  
20  
21  
22 34 This systematic review follows PRISMA guidelines. Appropriate studies will be  
23  
24  
25 35 identified in the following databases: MEDLINE, EMBASE, AMED and PSYCHinfo.  
26  
27  
28  
29 36 Two reviewers will independently screen each title and abstract. Studies eligible for  
30  
31  
32 37 data extraction will report estimates of CP prevalence for each sex, and/or a  
33  
34  
35  
36 38 measure of the difference in prevalence between sexes. The findings will be reported  
37  
38  
39 39 in a narrative synthesis following the Social Research Council Methods Programme  
40  
41  
42 40 guidelines. A random effects meta-analysis will be conducted where the reviewers  
43  
44  
45  
46 41 can justify combining results.  
47  
48  
49

## 50 42 **Ethics and dissemination**

51  
52  
53  
54 43 This review will summarise the prevalence of CP in men and women at mid-life,  
55  
56  
57  
58 44 based on existing evidence. It is expected that the results will identify gaps in  
59  
60

1  
2  
3  
4 45 knowledge and areas for further research. The review will be submitted for  
5  
6  
7 46 publication in topic specific journals and disseminated to professional networks.  
8  
9  
10  
11 47 Individual patient data is not included, so ethical approval is not required.  
12  
13

## 14 48 **Strengths and limitations**

- 15  
16  
17  
18  
19 49 • This protocol offers a systematic approach to determining the difference in  
20  
21  
22 50 chronic pain prevalence in men and women at mid-life  
23  
24  
25  
26 51 • Sex difference is explored by geographic region, chronicity threshold and pain  
27  
28  
29 52 type  
30  
31  
32  
33 53 • Mid-life categorisation is limited to people aged 40-60  
34  
35  
36 54 • Articles in English language only will be reviewed  
37  
38  
39  
40 55

## 41 42 43 56 **SYSTEMATIC REVIEW REGISTRATION**

44  
45  
46  
47 57 PROSPERO: CRD42021295895  
48  
49

## 50 51 58 **KEYWORDS**

52  
53  
54  
55  
56 59 chronic pain; persistent pain; prevalence; sex; sex inequalities; gender inequalities  
57  
58  
59  
60

1  
2  
3  
4  
5 60  
6  
7  
8  
9  
10  
11  
1213 61  
14  
15  
16  
17  
18  
19  
20  
21  
22 62  
23  
24  
25  
26  
27  
28  
29  
30 63  
31  
32  
33  
3435  
36 64 **BACKGROUND**  
37  
38  
39  
40  
41 65  
42  
43  
44 66 **Rationale**  
45  
46  
47

48 67 Chronic pain (CP) – pain that lasts for longer than three months [1] – is becoming  
49  
50  
51 68 increasingly common [2–4], and threatens the physical, social and psychological  
52  
53  
54  
55 69 wellbeing of those who suffer with it [5–11]. While pain is a common experience,  
56  
57  
58  
59 70 previous research has pointed at inequality in CP distribution between men and  
60



1  
2  
3  
4 71 women, with women being more likely to experience CP [12–19]. There are different  
5  
6  
7 72 hypotheses explaining this inequality: one relates to sex-linked factors, like  
8  
9  
10 73 hormones and reproductive factors [20–22], and another relates CP to discrepancies  
11  
12  
13  
14 74 in the social and cultural experiences of pain between genders [23–25]. While  
15  
16  
17 75 systematic reviews have attested to the unequal distribution of CP in childhood and  
18  
19  
20  
21 76 adolescence [26,27] and older age [13,17,18,28–32], the evidence is less clear about  
22  
23  
24 77 the difference in prevalence of CP at mid-life – the period defined between ages of  
25  
26  
27  
28 78 40-60, although definitions of exact age range vary [33–38]. CP in mid-life may have  
29  
30  
31 79 significant impact on a person’s ability to work [2,39] and to lead a fulfilling life [40–  
32  
33  
34  
35 80 42], so acknowledging the differences in CP distribution among the sexes may  
36  
37  
38  
39 81 provide an arena for targeted prevention and management interventions to decrease  
40  
41  
42 82 CP burden later in life. Moreover, mid-life may be an important period for the  
43  
44  
45 83 experience of CP as it can be a period of stress [37,43–49] when the first physical  
46  
47  
48  
49 84 signs of ageing [3,37,44], degenerative changes (like those linked to osteoarthritis)  
50  
51  
52 85 [50,51] and sex-specific changes (like menopause) are met with changes in an  
53  
54  
55  
56 86 individual’s social structure [37,52]. Such changes in mid-life may thus affect men  
57  
58  
59  
60

1  
2  
3  
4 87 and women differently, exacerbating the difference in chronic pain prevalence  
5  
6  
7 88 between the sexes.  
8  
9

10 89 For example, there is epidemiological evidence suggesting that women experience  
11  
12  
13  
14 90 more musculoskeletal pain around the peri-menopause compared with pre-  
15  
16  
17 91 menopausal women, and that the pain persists into later life [31].  
18  
19  
20  
21 92

22  
23  
24 93 Previous systematic reviews have addressed the prevalence of CP by sex in the  
25  
26  
27  
28 94 adult population spanning from 18 years to older age [16–19,53]. Mansfield *et al*  
29  
30  
31 95 (2016), for example, identified that prevalence of chronic widespread pain was  
32  
33  
34  
35 96 higher in women over 40, while Fayaz *et al* (2016) reported an increase in  
36  
37  
38 97 prevalence of CP with age in the pooled sample. In summary, current systematic  
39  
40  
41  
42 98 reviews of CP prevalence in adults either fail to differentiate between phases of  
43  
44  
45 99 adulthood [17,18,29,53] or have not stratified results by sex at mid-life [15,54,55]. By  
46  
47  
48  
49 100 considering the sex-difference in prevalence of CP at mid-life in the general  
50  
51  
52 101 population, this review aims at addressing this gap in the literature. The evidence  
53  
54  
55  
56 102 summarised in this review will provide background for further work evaluating sex-  
57  
58  
59  
60

1  
2  
3  
4 103 and gender-based factors for CP in mid-life, and comparing sex differences in CP  
5  
6  
7 104 prevalence in specific patient groups and population sub-groups.  
8  
9

10  
11 105  
12

## 13 14 106 **Objectives** 15 16

17  
18 107 We will therefore carry out a systematic review to update the work of previous  
19  
20  
21 108 reviews and investigate CP prevalence by sex and sex-differences in CP in mid-life  
22  
23  
24  
25 109 in the general population, drawing from available published data. The review aims at  
26  
27  
28 110 answering the following questions:  
29  
30

31  
32 111  
33

- 34  
35 112 • What is the prevalence of CP in men and in women in the general population  
36  
37  
38  
39 113 at mid-life?  
40  
41
- 42 114 • What is the difference in CP prevalence between men and women in the  
43  
44  
45  
46 115 general population?  
47  
48

49  
50 116  
51

52  
53 117 This review will consider CP as defined by the International Association for the Study  
54  
55  
56 118 of Pain [1]. While people who are suffering from pain due to other diseases (e.g.  
57  
58  
59  
60

1  
2  
3  
4 119 diabetes, cancer) might be included within general population surveys of pain, the  
5  
6  
7 120 review will not include studies that only investigate CP specific to a disease process.  
8  
9  
10 121 Heterogeneity in the results and variation across studies will be explored according  
11  
12  
13  
14 122 to three characteristics - geographic region, chronicity threshold, and pain type.  
15  
16  
17 123 Geographic region has been shown to relate to differences in pain prevalence in  
18  
19  
20  
21 124 other systematic reviews of CP incidence, with higher prevalence in lower-income  
22  
23  
24 125 countries [16,53]. Similarly, differences in chronicity threshold (e.g. pain for 3 months  
25  
26  
27  
28 126 or longer [1]; pain for six months or longer; pain for 1 month or longer) have shown to  
29  
30  
31 127 have an effect on CP prevalence estimates [56]. Lastly, the type of CP (e.g. generic,  
32  
33  
34  
35 128 regional, widespread) will represent further sources of heterogeneity since  
36  
37  
38 129 conditions associated with certain types of CP have different sex prevalence [57].  
39  
40  
41  
42 130  
43  
44  
45 131 Study quality will be assessed using a tool developed for prevalence studies by Hoy  
46  
47  
48  
49 132 et al [58], and previously used in reviews of pain prevalence literature [59].  
50  
51  
52  
53 133  
54  
55  
56 134  
57  
58  
59  
60

## 135 **METHODS**

136 This protocol is registered with the PROSPERO database and will be recorded using  
137 the Preferred Reporting Items for Systematic Reviews and Meta-Analyses Protocols  
138 (PRISMA-P) [60] (see Supplementary material). PROSPERO will be updated with  
139 significant protocol amendments.

### 140 **Patient and public involvement**

141 The research aims were determined with input from the patient and public  
142 involvement activities for an ethnographic study about the experiences of  
143 perimenopausal women with chronic pain conducted by the same research team.  
144 Participants commented on the relevance of sex differences in CP distribution and  
145 the importance of mid-life in relation to CP development.

146

### 147 **Eligibility criteria**

148 Studies will be included if they:

- 149 • Are original studies published in peer reviewed journals.

- 1  
2  
3  
4 150 • Examine the prevalence of CP for each sex and/or sex difference in the 40-60  
5  
6  
7 151 age group (determined according to Lachman (2011) and as age  
8  
9  
10 152 categorisations commonly used in studies are in 5 or 10 year age bands) in  
11  
12  
13  
14 153 men and women separately [37]. Only estimates from studies where an entire  
15  
16  
17 154 sample falls within the band will be included.
- 18  
19  
20  
21 155 • Use samples selected from the general population.
- 22  
23  
24 156 • Use any clearly stated CP definition in line with the International Association  
25  
26  
27  
28 157 for the Study of Pain (IASP) definition of pain lasting longer than three months  
29  
30  
31 158 [61], including generic, regional and widespread CP.
- 32  
33  
34  
35 159 • Clearly state the country in which data was collected.
- 36  
37  
38 160 • Use data from an observational study, such as prospective and retrospective  
39  
40  
41  
42 161 cohorts, cross-sectional and case control studies.
- 43  
44  
45 162 • Are written in English.

46  
47  
48  
49 163  
50  
51  
52 164 Studies will be excluded if they:

- 53  
54  
55  
56 165 • Do not meet inclusion criteria.
- 57  
58  
59 166 • Are reviews, conference proceedings, editorials and letters.
- 60

- 1  
2  
3  
4 167       • Are samples of specific groups or sub-samples of the general population that  
5  
6  
7 168       are not representative of the general population eg. clinical or disease-specific  
8  
9  
10 169       samples, ethnic minority samples, employment-based samples etc.  
11  
12  
13  
14 170

## 171 **Information sources and search strategy**

172 An electronic search will identify appropriate studies. The selected databases are  
173 MEDLINE, to be accessed through Web of Science as an interface; and EMBASE,  
174 AMED and PSYCHinfo to be accessed through Ovid as an interface. These  
175 databases will be searched from earliest entries to 10 January 2022. The search  
176 strategy is based on CP terms, study terms, moderators, and limits. Different  
177 techniques will be followed to ensure the search terms identify all relevant articles,  
178 and the search strategy will be piloted to make sure it is selecting relevant articles.  
179 The search terms and various search tools used for the different databases are  
180 outlined in Table 1. The reference lists of fully eligible texts will also be screened to  
181 identify potential inclusions.  
182 The study will start in January 2022 and end upon submission of the study report for  
183 publication – expected in July 2023.

184 *Table 1: Search strategy*

185

|                    | <i>MEDLINE (Web of Science)</i>                                                                                                                                                  | <i>EMBASE + AMED + PSYCHinfo (Ovid)</i>                                                                                                                                                                                                     |
|--------------------|----------------------------------------------------------------------------------------------------------------------------------------------------------------------------------|---------------------------------------------------------------------------------------------------------------------------------------------------------------------------------------------------------------------------------------------|
| <i>Pain terms</i>  | Chronic pain (MeSH Heading)<br>OR fibromyalgia (MeSH Heading)<br>NOT<br>cancer OR diabetes OR<br>neuropath* OR paed* OR child*<br>OR adolescen*                                  | Chronic pain OR persistent pain OR<br>fibromyalgia (abstract)<br>NOT cancer OR diabetes OR<br>neuropath* OR paed* OR child* OR<br>adolescen* (abstract)                                                                                     |
| <i>Study terms</i> | epidemiology OR cohort stud*<br>OR cohort analys* OR cross<br>sectional stud* OR cross<br>sectional analys* OR<br>observational analys* OR<br>prevalence OR disease<br>frequency | Epidemiolog* OR cohort stud* OR<br>cohort analys* OR cross sectional<br>stud* OR cross-sectional* OR cross<br>sectional analys* OR observational<br>analys* OR prevalence OR disease<br>frequency NOT trial OR clinical trial<br>(abstract) |
| <i>Moderators</i>  | Women OR female<br>Men OR male                                                                                                                                                   | AND Male OR men (all fields)<br>AND Female OR women (all fields)                                                                                                                                                                            |
| <i>Limits</i>      | Excluding RCTs and clinical<br>studies/reviews<br>English language only<br>Journal articles only                                                                                 | English language only                                                                                                                                                                                                                       |

186 *Legend: MeSH terms are the Medical Subject Headings used for indexing articles in*  
 187 *MEDLINE; The truncation command \* is used to capture search terms which may*  
 188 *have alternative endings; The Boolean logic operator AND combines results from the*  
 189 *different search terms; The Boolean logic operator OR identifies results which*  
 190 *include at least one of the search terms.*

191



## 192 Study selection

193 Duplicate search results will be removed from the final search list, which will be  
 194 stored in Rayyan QCRI – a free systematic review software. The review team will  
 195 consist of three researchers and two of these will independently screen each title  
 196 and abstract for eligibility using a template (Tables 2a-2b). The full text of the  
 197 remaining articles will be retrieved using the UCL findit@UCL linking service.  
 198 Inaccessible articles will be dealt with by contacting the authors directly. Each full  
 199 text will be independently reviewed by two of the three researchers for final eligibility.  
 200 Reasons for exclusion will be recorded and documented. At each stage of screening,  
 201 any differences between researchers will be resolved through discussion. Figure 1  
 202 represents a flow diagram of the study selection process.

203

204 *Table 2a: Eligibility template - inclusion*

|                   | Inclusion                                            |                                                                     |                                             |                                                                                |                                                       |                       |                    |
|-------------------|------------------------------------------------------|---------------------------------------------------------------------|---------------------------------------------|--------------------------------------------------------------------------------|-------------------------------------------------------|-----------------------|--------------------|
| Article reference | Original studies published in peer reviewed journals | Prevalence of CP in the 40-60 age group in men and women separately | Sample selected from the general population | CP definition in line with the International Association for the Study of Pain | Clearly state the country in which data was collected | Observational studies | Written in English |

|  |     |     |     |                      |     |     |     |
|--|-----|-----|-----|----------------------|-----|-----|-----|
|  |     |     |     | (IASP)<br>definition |     |     |     |
|  | Y/N | Y/N | Y/N | Y/N                  | Y/N | Y/N | Y/N |
|  |     |     |     |                      |     |     |     |
|  |     |     |     |                      |     |     |     |
|  |     |     |     |                      |     |     |     |
|  |     |     |     |                      |     |     |     |

205

206 *Table 2b: Eligibility template - exclusion*

|                      | Exclusion                               |                                                                      |                                                                                           |
|----------------------|-----------------------------------------|----------------------------------------------------------------------|-------------------------------------------------------------------------------------------|
| Article<br>reference | Do not<br>meet<br>inclusion<br>criteria | Reviews,<br>conference<br>proceeding<br>s, editorials<br>and letters | Samples of<br>specific<br>groups, eg.<br>clinical<br>samples,<br>population<br>minorities |
|                      | Y/N                                     | Y/N                                                                  | Y/N                                                                                       |
|                      |                                         |                                                                      |                                                                                           |
|                      |                                         |                                                                      |                                                                                           |

207

208 [FIGURE 1]

209

210 **Data extraction and quality assessment**

211 Data extraction will be conducted by the three reviewers for the following data items:

212 citation details (including year of publication and title), study design, country, sample

213 size, CP definition, CP type, CP measurement, age measurement, sex measurement

214 (sex and/or gender), estimates of CP, estimates of sex difference, estimates of CP

215 prevalence for each sex.

216

217 A data extraction form (Tables 3a-3b) will be used and data will be extracted for each  
 218 paper by two independent reviewers, who will resolve any discrepancies by  
 219 discussion and supervision of an experienced member of the team (RH).

220

221 *Table 3a: Data extraction form*

222 *Screening form:*

223

|                                         |     |    |    |
|-----------------------------------------|-----|----|----|
| <b>Bibliographic reference details:</b> |     |    |    |
| First author                            |     |    |    |
| Title                                   |     |    |    |
| Journal                                 |     |    |    |
| Volume                                  |     |    |    |
| Year of publication                     |     |    |    |
| Reviewer                                | CB  | JP | RH |
| Date                                    |     |    |    |
| <b>Inclusion</b>                        | Yes | No |    |
| <b>Reasons for exclusion:</b>           |     |    |    |
| Ineligible population                   | Yes | No |    |
| Ineligible study design                 | Yes | No |    |
| Ineligible outcome                      | Yes | No |    |
| Ineligible publication type             | Yes | No |    |
| Not in English                          | Yes | No |    |
| Duplicate                               | Yes | No |    |
| Other                                   |     |    |    |

224

225 *Table 3b: Data extraction form:*

226

|                                                                                                                        |                   |                       |        |
|------------------------------------------------------------------------------------------------------------------------|-------------------|-----------------------|--------|
| <b>Bibliographic reference details:</b>                                                                                |                   |                       |        |
| First author                                                                                                           |                   |                       |        |
| Title                                                                                                                  |                   |                       |        |
| Journal                                                                                                                |                   |                       |        |
| Volume                                                                                                                 |                   |                       |        |
| Year of publication                                                                                                    |                   |                       |        |
| Reviewer                                                                                                               | CB                | JP                    | RH     |
| <b>Study characteristics:</b>                                                                                          |                   |                       |        |
| Study design                                                                                                           | Cohort study      | Cross-sectional study | Other: |
| Sample size                                                                                                            |                   |                       |        |
| Country                                                                                                                |                   |                       |        |
| <b>Measurements:</b>                                                                                                   |                   |                       |        |
| CP definition                                                                                                          | IASP              | Other:                |        |
| CP measurement                                                                                                         |                   |                       |        |
| Sex measurement                                                                                                        | Self-reported sex | Self-reported gender  |        |
| Age measurement                                                                                                        |                   |                       |        |
| <b>Outcomes:</b>                                                                                                       |                   |                       |        |
| Outcome type                                                                                                           | OR                | %                     | Other: |
| Estimates of CP                                                                                                        |                   |                       |        |
| Estimates of sex difference                                                                                            |                   |                       |        |
| Estimates of CP prevalence for each sex                                                                                |                   |                       |        |
| <b>Risk of bias:</b>                                                                                                   |                   |                       |        |
| External validity:                                                                                                     |                   |                       |        |
| Was the study's target population a close representation of the national population in relation to relevant variables? | Yes               | No                    |        |
| Was the sampling frame a true or close representation of the target population?                                        | Yes               | No                    |        |
| Was some form of random selection used to select the sample, OR was a census undertaken?                               | Yes               | No                    |        |

|                                                                                                          |     |          |      |
|----------------------------------------------------------------------------------------------------------|-----|----------|------|
| Was the likelihood of nonresponse bias minimal?<br>Internal                                              | Yes | No       |      |
| Were data collected directly from the subjects (as opposed to a proxy)?                                  | Yes | No       |      |
| Was an acceptable case definition used in the study?                                                     | Yes | No       |      |
| Was the study instrument that measured the parameter of interest shown to have validity and reliability? | Yes | No       |      |
| Internal validity:                                                                                       |     |          |      |
| Was the same mode of data collection used for all subjects?                                              | Yes | No       |      |
| Was the length of the shortest prevalence period for the parameter of interest appropriate?              | Yes | No       |      |
| Were the numerator(s) and denominator(s) for the parameter of interest appropriate?                      | Yes | No       |      |
| Summary item on the overall risk of study bias                                                           | Low | Moderate | High |

227

228

229 The primary estimates of interest are CP prevalence by sex and an estimate of the

230 sex difference in pain (e.g. difference in prevalence or relative risk or odds ratio).

231 Geographic region will be classified according to – the United Nations (UN) and

232 World Health Organisation (WHO) region classification [62][63], and the Human

233 Development Index (HDI) for each country – a measures of population wealth [64],

234 which has previously used in CP prevalence reviews [16,53]. Chronicity threshold

1  
2  
3  
4 235 will be classified as over 3 months or over 6 months [1,65]. Pain type will be  
5  
6  
7 236 categorised as generic, regional (in one body part only) or widespread (in multiple  
8  
9  
10 237 body parts according to the American College of Rheumatology's definition of  
11  
12  
13  
14 238 chronic widespread pain) [66].  
15  
16

17 239

## 21 240 Quality assessment

22  
23  
24 241 Study quality will be addressed using a tool for risk of bias assessment for  
25  
26  
27  
28 242 prevalence studies which explores internal and external validity and scores studies  
29  
30  
31 243 as low, moderate or high risk of bias [58]. This tool has high interrater agreement,  
32  
33  
34  
35 244 and it has previously been used in pain prevalence systematic reviews [59]. For this  
36  
37  
38 245 review, two independent reviewers will use a checklist based on this tool, which can  
39  
40  
41  
42 246 be found in Table 3.  
43  
44

45 247

## 49 248 Synthesis

### 53 249 Narrative synthesis

54  
55  
56 250 A descriptive summary of studies will be provided using tables and addressing the  
57  
58  
59  
60 251 following domains: primary outcomes, CP definition, CP type, sex/gender, age,

1  
2  
3  
4 252 chronicity threshold, pain type, geographic location; and study quality assessment. It

5  
6  
7 253 will comment on the similarity of the methods used by the different studies and on

8  
9  
10 254 the possibility for meta-analysis.

11  
12  
13  
14 255 The correspondence between mid-life and the age category utilised in this study is

15  
16  
17 256 based on life-expectancy in the global north. Countries with lower life expectancy

18  
19  
20  
21 257 may have different thresholds for midlife, and we will address this when discussing

22  
23  
24 258 geographical differences in prevalence.

25  
26  
27  
28 259

29  
30  
31 260 The narrative synthesis will follow the Social Research Council Methods Programme

32  
33  
34 261 guidelines [67], with a focus on identifying and exploring the prespecified sources of

35  
36  
37  
38 262 heterogeneity.

39  
40  
41  
42 263

43  
44  
45 264 **Meta-analysis**

46  
47  
48 265 A meta-analysis will be conducted if enough studies provide the relevance

49  
50  
51  
52 266 prevalence information by sex for the defined age group, and where the reviewers

53  
54  
55 267 can justify combining results.

56  
57  
58  
59 268

1  
2  
3  
4 269 A random effects meta-analysis will be used to combine estimates of sex difference  
5  
6  
7 270 in CP (e.g. difference in prevalence, odds ration or relative risk). These will be  
8  
9  
10 271 presented in a Forest plot. The  $I^2$  statistic will be used to assess the extent of  
11  
12  
13  
14 272 heterogeneity in estimates. If there are enough studies included, sub-group analysis  
15  
16  
17 273 or meta-regression will be performed to investigate heterogeneity related to (i)  
18  
19  
20  
21 274 geographic region (coded in three ways: UN, WHO and HDI), (ii) chronicity threshold  
22  
23  
24 275 (over 3 months, over 6 months) and (iii) pain type (generic, regional, widespread).  
25  
26  
27  
28 276 Publication bias will be assessed separately using a funnel plot. A sensitivity analysis  
29  
30  
31 277 excluding low quality studies will be carried out.  
32  
33  
34  
35 278

## 38 279 **Reporting**

40  
41  
42 280 The results of this systematic review will be shared in accordance with the Preferred  
43  
44  
45  
46 281 Reporting Items for Systematic Reviews and Meta-Analyses (PRISMA) 2020  
47  
48  
49 282 guidelines [68].  
50  
51  
52  
53 283  
54  
55  
56 284  
57  
58  
59  
60



## 285 Ethics

286 The data will not include individual patient data so ethical approval is not required.

287

## 288 DISCUSSION

289 This study will review existing literature estimating CP prevalence and considers the  
290 differences by sex/gender at mid-life, contributing to the literature about sex  
291 differences in CP prevalence. Heterogeneity in results will be assessed according to  
292 geographic region, chronicity threshold and CP type. The strengths and limitations  
293 will be considered – for example, the restrictions posed by the inclusion criteria on a  
294 particular age bracket, published sex data and the need for country to be stated.  
295 Measurement and reporting of sex (and gender) will be discussed. The results of this  
296 review will provide a significant step towards identifying CP inequalities in mid-life  
297 between the sexes and identify areas for further research. A better understanding of  
298 the relationship of CP emergence, sex and the middle years in the general  
299 population may inform better early-prevention-and-treatment strategies that tackle  
300 the distinct pathways for men and women.

1  
2  
3  
4 301  
5  
6  
7  
8 302

## LIST OF ABBREVIATIONS

9  
10  
11 303 CP: Chronic Pain  
12  
13  
14  
15 304  
16  
17  
18  
19

## DECLARATIONS

20 305  
21  
22  
23  
24 306 Ethics approval and consent to participate  
25  
26  
27

28 307 Not applicable.  
29  
30  
31

32 308 Consent for publication  
33  
34  
35

36 309 Not applicable.  
37  
38  
39

40 310 Availability of data and materials  
41  
42  
43

44 311 Not applicable.  
45  
46  
47

48 312 Competing interests  
49  
50  
51

52 313 The authors declare that they have no competing interests.  
53  
54  
55  
56  
57  
58  
59  
60

## 314 Funding

315 Catherine Borra is supported by a PhD studentship funded by the Economic and

316 Social Research Council (ESRC) and the Biotechnology and Biological Sciences

317 Research Council (BBSRC) (award reference: ES/T00200X/1). Rebecca Hardy is

318 Director of the CLOSER consortium, which is supported by the Economic and Social

319 Research Council (ESRC) (award reference: ES/K000357/1).

320 Roles of funder: none.

321 Guarantor: Catherine Borra

## 322 Authors' contributions

323 CB is the main author of the draft of this manuscript. RH contributed with edits and

324 methodological guidance, resulting in two further drafts. All authors read and

325 approved the final manuscript.

## 326 Acknowledgements

327 Dr. Nazlin Bhimani provided search term guidance which was instrumental in

328 developing the search strategy for this protocol.

329

1  
2  
3  
4 3305  
6  
7 331 **REGISTRATION**8  
9  
10  
11 332 PROSPERO: CRD4202129589512  
13  
14  
15 33316  
17  
18  
19 33420  
21  
22 335 **REFERENCE LIST**23  
24  
25  
26  
27 33628  
29  
30 337 1 Treede RD, Rief W, Barke A, *et al.* Chronic pain as a symptom or a disease:31  
32  
33 338 The IASP Classification of Chronic Pain for the International Classification of34  
35  
36  
37 339 Diseases (ICD-11). *Pain* 2019;**160**:19–27.38  
39  
40  
41 340 doi:10.1097/j.pain.000000000000138442  
43  
44 341 2 Dahlhamer J, Lucas J, Zelaya, C, *et al.* Prevalence of Chronic Pain and High-45  
46  
47  
48 342 Impact Chronic Pain Among Adults — United States, 2016. *MMWR Morb*49  
50  
51 343 *Mortal Wkly Rep* 2018;**67**:1001–6. doi:10.15585/mmwr.mm6736a252  
53  
54 344 3 Case A, Deaton A, Stone AA. Decoding the mystery of American pain reveals55  
56  
57  
58 345 a warning for the future. *Proc Natl Acad Sci U S A* 2020;**117**:24785–9.59  
60

- 1  
2  
3  
4 346 doi:10.1073/pnas.2012350117  
5  
6  
7 347 4 Zimmer Z, Zajacova A. Persistent, Consistent, and Extensive: The Trend of  
8  
9  
10 348 Increasing Pain Prevalence in Older Americans. *Journals Gerontol - Ser B*  
11  
12  
13  
14 349 *Psychol Sci Soc Sci* 2020;**75**:436–47. doi:10.1093/geronb/gbx162  
15  
16  
17 350 5 Brennan PL. Life Stressors: Elevations and Disparities Among Older Adults  
18  
19  
20  
21 351 with Pain. *Pain Med* 2020;**21**:2123–36. doi:10.1093/pm/pnaa189  
22  
23  
24 352 6 Phillips CJ. The Cost and Burden of Chronic Pain. *Rev Pain* 2009;**3**:2–5.  
25  
26  
27  
28 353 doi:10.1177/204946370900300102  
29  
30  
31 354 7 Yang Y, Grol-Prokopczyk H. Chronic Pain and Friendship Among Middle-Aged  
32  
33  
34  
35 355 and Older U.S. Adults. *Journals Gerontol Ser B* 2020;**XX**:1–12.  
36  
37  
38 356 doi:10.1093/geronb/gbaa185  
39  
40  
41  
42 357 8 Institute of Medicine (US) Committee on Advancing Pain Research, Care and  
43  
44  
45 358 E. Relieving Pain in America: A Blueprint for Transforming Prevention, Care,  
46  
47  
48  
49 359 Education, and Research. Washington (DC): 2011. doi:pmid: 22553896.  
50  
51  
52 360 9 Goldberg DS, McGee SJ. Pain as a global public health priority. *BMC Public*  
53  
54  
55  
56 361 *Health* 2011;**11**:770. doi:10.1186/1471-2458-11-770  
57  
58  
59 362 10 Breivik H, Eisenberg E, O'Brien T. The individual and societal burden of  
60

- 1  
2  
3  
4 363 chronic pain in Europe: The case for strategic prioritisation and action to  
5  
6  
7 364 improve knowledge and availability of appropriate care. *BMC Public Health*  
8  
9  
10 365 2013;**13**. doi:10.1186/1471-2458-13-1229  
11  
12  
13  
14 366 11 Yiengprugsawan V, Steptoe A. Impacts of persistent general and site-specific  
15  
16  
17 367 pain on activities of daily living and physical performance: A prospective  
18  
19  
20 368 analysis of the English Longitudinal Study of Ageing. *Geriatr Gerontol Int*  
21  
22  
23  
24 369 2018;**18**:1051–7. doi:10.1111/ggi.13304  
25  
26  
27  
28 370 12 Greenspan JD, Craft RM, LeResche L, *et al*. Studying sex and gender  
29  
30  
31 371 differences in pain and analgesia: A consensus report. *Pain* 2007;**132**:26–45.  
32  
33  
34  
35 372 doi:10.1016/j.pain.2007.10.014  
36  
37  
38 373 13 Larsson C, Hansson EE, Sundquist K, *et al*. Chronic pain in older adults:  
39  
40  
41 374 prevalence, incidence, and risk factors. *Scand J Rheumatol* 2017;**46**:317–25.  
42  
43  
44  
45 375 doi:10.1080/03009742.2016.1218543  
46  
47  
48  
49 376 14 Mundal I, Gråwe RW, Bjørngaard JH, *et al*. Prevalence and long-term  
50  
51  
52 377 predictors of persistent chronic widespread pain in the general population in an  
53  
54  
55 378 11-year prospective study: The HUNT study. *BMC Musculoskelet Disord*  
56  
57  
58  
59 379 2014;**15**. doi:10.1186/1471-2474-15-213  
60

- 1  
2  
3  
4 380 15 Souza JB De, Grossmann E, Perissinotti DiMN, *et al.* Prevalence of Chronic  
5  
6  
7 381 Pain, Treatments, Perception, and Interference on Life Activities: Brazilian  
8  
9  
10 382 Population-Based Survey. *Pain Res Manag* 2017;**2017**.  
11  
12  
13  
14 383 doi:10.1155/2017/4643830  
15  
16  
17 384 16 Andrews P, Steultjens M, Riskowski J. Chronic widespread pain prevalence in  
18  
19  
20  
21 385 the general population: A systematic review. *Eur J Pain (United Kingdom)*  
22  
23  
24 386 2018;**22**:5–18. doi:10.1002/ejp.1090  
25  
26  
27  
28 387 17 Jackson T, Thomas S, Stabile V, *et al.* Prevalence of chronic pain in low-  
29  
30  
31 388 income and middle-income countries: a systematic review and meta-analysis.  
32  
33  
34  
35 389 *Lancet* 2015;**385**:S10. doi:10.1016/s0140-6736(15)60805-4  
36  
37  
38 390 18 Øverås CK, Johansson MS, de Campos TF, *et al.* Distribution and prevalence  
39  
40  
41 391 of musculoskeletal pain co-occurring with persistent low back pain: a  
42  
43  
44  
45 392 systematic review. *BMC Musculoskelet Disord* 2021;**22**:1–14.  
46  
47  
48  
49 393 doi:10.1186/s12891-020-03893-z  
50  
51  
52 394 19 Fayaz A, Croft P, Langford RM, *et al.* Prevalence of chronic pain in the UK: a  
53  
54  
55 395 systematic review and meta-analysis of population studies. *BMJ Open*  
56  
57  
58  
59 396 2016;**6**:e010364. doi:10.1136/bmjopen-2015-010364  
60

- 1  
2  
3  
4 397 20 Vincent K, Warnaby C, Stagg CJ, *et al.* Brain imaging reveals that engagement  
5  
6  
7 398 of descending inhibitory pain pathways in healthy women in a low endogenous  
8  
9  
10 399 estradiol state varies with testosterone. *Pain* 2013;**154**:515–24.  
11  
12  
13  
14 400 doi:10.1016/j.pain.2012.11.016  
15  
16  
17 401 21 Macfarlane T V., Blinkhorn A, Worthington H V., *et al.* Sex hormonal factors  
18  
19  
20  
21 402 and chronic widespread pain: A population study among women.  
22  
23  
24 403 *Rheumatology* 2002;**41**:454–7. doi:10.1093/rheumatology/41.4.454  
25  
26  
27  
28 404 22 Dias RCA, Kulak Junior J, Ferreira da Costa EH, *et al.* Fibromyalgia, sleep  
29  
30  
31 405 disturbance and menopause: Is there a relationship? A literature review. *Int J*  
32  
33  
34 406 *Rheum Dis* 2019;**22**:1961–71. doi:10.1111/1756-185X.13713  
35  
36  
37  
38 407 23 Nijs J, George SZ, Clauw DJ, *et al.* Central sensitisation in chronic pain  
39  
40  
41  
42 408 conditions: latest discoveries and their potential for precision medicine. *Lancet*  
43  
44  
45 409 *Rheumatol* 2021;:383–92. doi:10.1016/s2665-9913(21)00032-1  
46  
47  
48  
49 410 24 Munro GB. Chronic Pain, Chronic Stress and Depression: Coincidence or  
50  
51  
52 411 Consequence? - Blackburn-Munro - 2001 - Journal of Neuroendocrinology -  
53  
54  
55 412 Wiley Online Library. *J...* 2001;**13**:1009–  
56  
57  
58  
59 413 23.<http://onlinelibrary.wiley.com/doi/10.1046/j.0007->  
60



- 1  
2  
3  
4 414 1331.2001.00727.x/full%5Cnpapers2://publication/uuid/D58A3567-D664-  
5  
6  
7 415 4D2D-8848-628253816778  
8  
9  
10 416 25 Hass-Cohen N, Clyde Findlay J. Pain, attachment, and meaning making:  
11  
12  
13  
14 417 Report on an art therapy relational neuroscience assessment protocol. *Arts*  
15  
16  
17 418 *Psychother* 2009;**36**:175–84. doi:10.1016/j.aip.2009.02.003  
18  
19  
20  
21 419 26 King S, Chambers CT, Huguet A, *et al.* The epidemiology of chronic pain in  
22  
23  
24 420 children and adolescents revisited: A systematic review. *Pain* 2011;**152**:2729–  
25  
26  
27  
28 421 38. doi:10.1016/j.pain.2011.07.016  
29  
30  
31 422 27 Silva C, Oliveira D, Pestana-Santos M, *et al.* Chronic non-cancer pain in  
32  
33  
34 423 adolescents: a narrative review. *Brazilian J Anesthesiol (English Ed)* Published  
35  
36  
37  
38 424 Online First: 2021. doi:10.1016/j.bjane.2021.04.033  
39  
40  
41  
42 425 28 Wong CK, Mak RY, Kwok TS, *et al.* Prevalence, Incidence, and Factors  
43  
44  
45 426 Associated With Non-Specific Chronic Low Back Pain in Community-Dwelling  
46  
47  
48  
49 427 Older Adults Aged 60 Years and Older: A Systematic Review and Meta-  
50  
51  
52 428 Analysis. *J Pain* 2021;**00**. doi:10.1016/j.jpain.2021.07.012  
53  
54  
55  
56 429 29 Mohamed Zaki LR, Hairi NN. A Systematic Review of the Prevalence and  
57  
58  
59 430 Measurement of Chronic Pain in Asian Adults. *Pain Manag Nurs* 2015;**16**:440–  
60

- 1  
2  
3  
4 431 52. doi:10.1016/j.pmn.2014.08.012  
5  
6  
7 432 30 Fayaz A, Croft P, Langford RM, *et al.* Prevalence of chronic pain in the UK: A  
8  
9  
10 433 systematic review and meta-analysis of population studies. *BMJ Open* 2016;**6**.  
11  
12  
13  
14 434 doi:10.1136/bmjopen-2015-010364  
15  
16  
17 435 31 Lu CB, Liu PF, Zhou YS, *et al.* Musculoskeletal pain during the menopausal  
18  
19  
20  
21 436 transition: A systematic review and meta-analysis. *Neural Plast* 2020;**2020**.  
22  
23  
24 437 doi:10.1155/2020/8842110  
25  
26  
27  
28 438 32 Yang L, Peng W. Prevalence and Factors Associated With Body Pain: Results  
29  
30  
31 439 of a Nationally Representative Survey of 9,586 Chinese Adults Aged 60 and  
32  
33  
34  
35 440 Over. *Front Public Heal* 2021;**9**:1–7. doi:10.3389/fpubh.2021.634123  
36  
37  
38 441 33 Zhang Z, Hayward MD. Gender, the marital life course, and cardiovascular  
39  
40  
41  
42 442 disease in late midlife. *J Marriage Fam* 2006;**68**:639–57. doi:10.1111/j.1741-  
43  
44  
45 443 3737.2006.00280.x  
46  
47  
48  
49 444 34 Keenan K, Ploubidis GB, Silverwood RJ, *et al.* Life-course partnership history  
50  
51  
52 445 and midlife health behaviours in a population-based birth cohort. *J Epidemiol*  
53  
54  
55 446 *Community Health* 2017;**71**:232–8. doi:10.1136/jech-2015-207051  
56  
57  
58  
59 447 35 Levinson DJ. A Conception of Adult Development. *Am Psychol* 1986;**41**:3–13.  
60

- 1  
2  
3  
4 448 doi:10.1037/0003-066X.41.1.3  
5  
6  
7 449 36 Livingston G, Huntley J, Sommerlad A, *et al.* Dementia prevention,  
8  
9  
10 450 intervention, and care: 2020 report of the Lancet Commission. *Lancet*  
11  
12  
13  
14 451 2020;**396**:413–46. doi:10.1016/S0140-6736(20)30367-6  
15  
16  
17 452 37 Lachman ME, Teshale S, Agrigoroaei S. Midlife as a pivotal in the life course:  
18  
19  
20  
21 453 Balancing growth and decline at the crossroads of youth and old age. *Int J*  
22  
23  
24 454 *Behav Dev* 2015;**39**:20–31. doi:10.1177/0165025414533223.Midlife  
25  
26  
27  
28 455 38 Lee J, Gutsche T. 2011 Harmonization of Cross - National Studies of Aging  
29  
30  
31 456 Meeting National Institute on Aging Prepared by : 2011.  
32  
33  
34  
35 457 39 Zelaya CE, Dahlhamer JM, Lucas JW, *et al.* Chronic Pain and High-impact  
36  
37  
38 458 Chronic Pain Among U.S. Adults, 2019. *NCHS Data Brief*2020;:1–8.  
39  
40  
41  
42 459 40 Rovner GS, Sunnerhagen KS, Björkdahl A, *et al.* Chronic pain and sex-  
43  
44  
45 460 differences; Women accept and move, while men feel blue. *PLoS One*  
46  
47  
48 461 2017;**12**:1–12. doi:10.1371/journal.pone.0175737  
49  
50  
51  
52 462 41 Patel K, Dansie E, Guralnik J, *et al.* Prevalence and impact of pain among  
53  
54  
55 463 older adults in the United States: findings from the National Health and aging  
56  
57  
58 464 trends study. *J Pain* 2013;**14**:S12. doi:10.1016/j.jpain.2013.01.057  
59  
60

- 1  
2  
3  
4 465 42 Blyth FM, Noguchi N. Chronic musculoskeletal pain and its impact on older  
5  
6  
7 466 people. *Best Pract Res Clin Rheumatol* 2017;**31**:160–8.  
8  
9  
10 467 doi:10.1016/j.berh.2017.10.004  
11  
12  
13  
14 468 43 Sievert LL, Jaff N, Woods NF. Stress and midlife women’s health. *Women’s*  
15  
16  
17 469 *Midlife Heal* 2018;**4**:1–5. doi:10.1186/s40695-018-0034-1  
18  
19  
20  
21 470 44 Thomas AJ, Mitchell ES, Woods NF. The challenges of midlife women: themes  
22  
23  
24 471 from the Seattle midlife Women’s health study. *Women’s Midlife Heal*  
25  
26  
27 472 2018;**4**:1–10. doi:10.1186/s40695-018-0039-9  
28  
29  
30  
31 473 45 Thomas AJ, Mitchell ES, Woods NF. Undesirable stressful life events, impact,  
32  
33  
34 474 and correlates during midlife: observations from the Seattle midlife women’s  
35  
36  
37 475 health study. *Women’s Midlife Heal* 2019;**5**:1–13. doi:10.1186/s40695-018-  
38  
39 0045-y  
40  
41  
42 476  
43  
44  
45 477 46 Hardy C, Thorne E, Griffiths A, *et al*. Work outcomes in midlife women: the  
46  
47  
48 478 impact of menopause, work stress and working environment. *Women’s Midlife*  
49  
50  
51 479 *Heal* 2018;**4**:1–8. doi:10.1186/s40695-018-0036-z  
52  
53  
54  
55 480 47 Hedgeman E, Hasson RE, Karvonen-Gutierrez CA, *et al*. Perceived stress  
56  
57  
58 481 across the midlife: longitudinal changes among a diverse sample of women,  
59  
60

- 1  
2  
3  
4 482 the Study of Women's health Across the Nation (SWAN). *Women's Midlife*  
5  
6  
7 483 *Heal* 2018;4:1–11. doi:10.1186/s40695-018-0032-3  
8  
9  
10 484 48 Dolsen MR, Crosswell AD, Prather AA. Links Between Stress, Sleep, and  
11  
12  
13  
14 485 Inflammation: Are there Sex Differences? *Curr Psychiatry Rep* 2019;21:4–9.  
15  
16  
17 486 doi:10.1007/s11920-019-0993-4  
18  
19  
20  
21 487 49 Blanchflower DG, Oswald AJ. Is Well-being U-Shaped over the Life Cycle ?  
22  
23  
24 488 IZA DP No . 3075 Is Well-Being U-Shaped over the Life Cycle ? Institute for  
25  
26  
27  
28 489 the Study of Labor. 2007.  
29  
30  
31 490 50 Szoekce CE, Cicuttini FM, Guthrie JR, *et al*. The relationship of reports of aches  
32  
33  
34  
35 491 and joint pains to the menopausal transition: A longitudinal study. *Climacteric*  
36  
37  
38 492 2008;11:55–62. doi:10.1080/13697130701746006  
39  
40  
41  
42 493 51 Alexander JL, Dennerstein L, Woods NF, *et al*. Arthralgias, bodily aches and  
43  
44  
45 494 pains and somatic complaints in midlife women: etiology, pathophysiology and  
46  
47  
48  
49 495 differential diagnosis. *Expert Rev Neurother* 2007;7:S15–26.  
50  
51  
52 496 doi:10.1586/14737175.7.11s.S15  
53  
54  
55  
56 497 52 McGinnis D. Resilience, Life Events, and Well-Being During Midlife: Examining  
57  
58  
59 498 Resilience Subgroups. *J Adult Dev* 2018;25:198–221. doi:10.1007/s10804-

- 1  
2  
3  
4 499 018-9288-y  
5  
6  
7 500 53 Mansfield KE, Sim J, Jordan JL, *et al.* A systematic review and meta-analysis  
8  
9  
10 501 of the prevalence of chronic widespread pain in the general population. *Pain*  
11  
12  
13  
14 502 2016;**157**:55–64. doi:10.1002/ejp.1090  
15  
16  
17 503 54 Sá KN, Moreira L, Baptista AF, *et al.* Prevalence of chronic pain in developing  
18  
19  
20  
21 504 countries: systematic review and meta-analysis. *PAIN Reports* 2019;**4**:e779.  
22  
23  
24 505 doi:10.1097/pr9.0000000000000779  
25  
26  
27  
28 506 55 Picavet HSJ, Monique Verschuren WM, Groot L, *et al.* Pain over the adult life  
29  
30  
31 507 course: 15-year pain trajectories—The Doetinchem Cohort Study. *Eur J Pain*  
32  
33  
34 508 (*United Kingdom*) 2019;**23**:1723–32. doi:10.1002/ejp.1450  
35  
36  
37  
38 509 56 Steingrimsdóttir ÓA, Landmark T, Macfarlane GJ, *et al.* Defining chronic pain  
39  
40  
41 510 in epidemiological studies: A systematic review and meta-analysis. *Pain*  
42  
43  
44 511 2017;**158**:2092–107. doi:10.1097/j.pain.0000000000001009  
45  
46  
47  
48  
49 512 57 LeResche L, Mancl LA, Drangsholt MT, *et al.* Relationship of pain and  
50  
51  
52 513 symptoms to pubertal development in adolescents. *Pain* 2005;**118**:201–9.  
53  
54  
55 514 doi:10.1016/j.pain.2005.08.011  
56  
57  
58  
59 515 58 Hoy D, Brooks P, Woolf A, *et al.* Assessing risk of bias in prevalence studies:  
60

- 1  
2  
3  
4 516 Modification of an existing tool and evidence of interrater agreement. *J Clin*  
5  
6  
7 517 *Epidemiol* 2012;**65**:934–9. doi:10.1016/j.jclinepi.2011.11.014  
8  
9  
10 518 59 Hoy D, Bain C, Williams G, *et al*. A systematic review of the global prevalence  
11  
12  
13  
14 519 of low back pain. *Arthritis Rheum* 2012;**64**:2028–37. doi:10.1002/art.34347  
15  
16  
17 520 60 Moher D, Shamseer L, Clarke M, *et al*. Preferred reporting items for systematic  
18  
19  
20  
21 521 review and meta-analysis protocols (PRISMA-P) 2015 statement. *Syst Rev*  
22  
23  
24 522 2015;**4**:1. doi:10.1186/2046-4053-4-1  
25  
26  
27 523 61 Treede R-D, Rief W, Barke A, *et al*. A classification of chronic pain for ICD-11.  
28  
29  
30  
31 524 *Pain* 2015;**156**:1003–7.  
32  
33  
34  
35 525 62 Statistics Division of the United Nations Secretariat. Standard country or area  
36  
37  
38 526 codes for statistical use (M49). 2018.  
39  
40  
41  
42 527 63 World Health Organisation. WHO regional offices. 2017.  
43  
44  
45 528 64 HDR. Human development reports. 2016.  
46  
47  
48  
49 529 65 Nugraha B, Gutenbrunner C, Barke A, *et al*. The IASP classification of chronic  
50  
51  
52 530 pain for ICD-11: Functioning properties of chronic pain. *Pain* 2019;**160**:88–94.  
53  
54  
55 531 doi:10.1097/j.pain.0000000000001433  
56  
57  
58  
59 532 66 Wolfe F, Smythe H, Yunus M, *et al*. The American College of Rheumatology  
60

- 1  
2  
3  
4 533 1990 criteria for the classification of fibromyalgia: report of the Multicenter  
5  
6  
7 534 Criteria Committee. *Arthritis Rheum* 1990;**33**:160–72.  
8  
9  
10 535 67 Popay JA, Sowden A, Petticrew M, *et al*. Guidance on the conduct of narrative  
11  
12  
13  
14 536 synthesis in systematic reviews. 2006.[https://www.lancaster.ac.uk/](https://www.lancaster.ac.uk/shm/research/nssr/research/d)  
15  
16  
17 537 [shm/research/nssr/research/d](https://www.lancaster.ac.uk/shm/research/nssr/research/d)  
18  
19  
20  
21 538 68 Page MJ, McKenzie JE, Bossuyt PM, *et al*. The PRISMA 2020 statement: An  
22  
23  
24 539 updated guideline for reporting systematic reviews. *Int J Surg* 2021;**88**:1–11.  
25  
26  
27 540 doi:10.1016/j.ijisu.2021.105906  
28  
29  
30  
31  
32 541  
33  
34  
35 542  
36  
37  
38 543  
39  
40  
41

## 544 Additional materials

545 Parts of this manuscript refer to the following additional material, which will be  
546 presented on submission:  
547

| Material type | File name |
|---------------|-----------|
|               |           |



|                                        |                              |
|----------------------------------------|------------------------------|
| Figure 1: Search Strategy Flow Diagram | Figure 1_search strategy.pfd |
| Supplementary material                 | Supplementary material.pfd   |

548

549

For peer review only

Figure 1: Study selection strategy – PRISMA 2020 Flow Diagram

From: Chronic pain prevalence in men and women in mid-life: a systematic review.

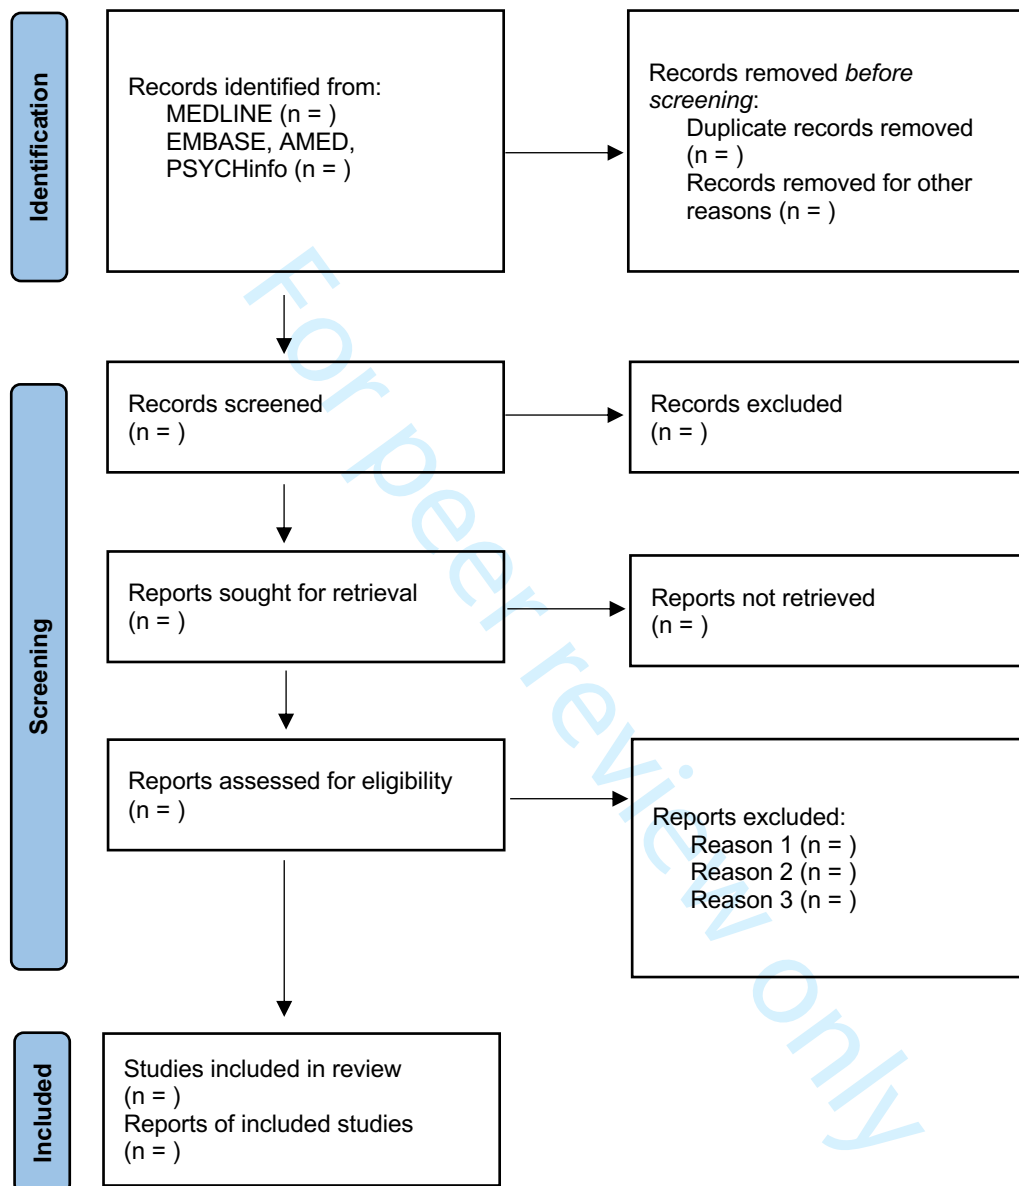

From: Page MJ, McKenzie JE, Bossuyt PM, Boutron I, Hoffmann TC, Mulrow CD, et al. The PRISMA 2020 statement: an updated guideline for reporting systematic reviews. *BMJ* 2021;372:n71. doi: 10.1136/bmj.n71

PRISMA-P (Preferred Reporting Items for Systematic review and Meta-Analysis Protocols) 2015 checklist: recommended items to address in a systematic review protocol\*

This checklist has been adapted for use with the systematic review protocol submissions to BioMed Central Journals from Table 3 in:

Moher D, Shamseer L, Clarke M, Ghersi D, Liberati A, Petticrew M, et al. Preferred reporting items for systematic review and meta-analysis protocols (PRISMA-P) 2015 statement. *Syst Rev* [Internet]. 2015;4 (1):1. Available from: <https://doi.org/10.1186/2046-4053-4-1>

It was adapted following guidelines from the editors-in-chief of *Systematic Reviews*:

Moher D, Stewart L, Shekelle P. Implementing PRISMA-P: Recommendations for prospective authors. *Syst Rev* [Internet]. 2016;5(1):4–5. Available from: <http://dx.doi.org/10.1186/s13643-016-0191-y>

| Section and topic                 | Item No | Checklist item                                                                                                                            | Information reported (Y/N) | Line number(s) |
|-----------------------------------|---------|-------------------------------------------------------------------------------------------------------------------------------------------|----------------------------|----------------|
| <b>ADMINISTRATIVE INFORMATION</b> |         |                                                                                                                                           |                            |                |
| Title:                            |         |                                                                                                                                           |                            |                |
| Identification                    | 1a      | Identify the report as a protocol of a systematic review                                                                                  | Y                          | 1-3            |
| Update                            | 1b      | If the protocol is for an update of a previous systematic review, identify as such                                                        | N/A                        | N/A            |
| Registration                      | 2       | If registered, provide the name of the registry (such as PROSPERO) and registration number                                                | Y                          | 54             |
| Authors:                          |         |                                                                                                                                           |                            |                |
| Contact                           | 3a      | Provide name, institutional affiliation, e-mail address of all protocol authors; provide physical mailing address of corresponding author | Y                          | 5-19           |
| Contributions                     | 3b      | Describe contributions of protocol authors and identify the guarantor of the review                                                       | Y                          | 309-312        |
| Amendments                        | 4       | If the protocol represents an amendment of a previously completed or published protocol,                                                  | NA                         | N/A            |

1  
2  
3  
4  
5  
6  
7  
8  
9  
10  
11  
12  
13  
14  
15  
16  
17  
18  
19  
20  
21  
22  
23  
24  
25  
26  
27  
28  
29  
30  
31  
32  
33  
34  
35  
36  
37  
38  
39  
40  
41  
42  
43  
44  
45  
46

|                           |    |                                                                                                                                                                                                                               |   |         |
|---------------------------|----|-------------------------------------------------------------------------------------------------------------------------------------------------------------------------------------------------------------------------------|---|---------|
|                           |    | identify as such and list changes; otherwise, state plan for documenting important protocol amendments                                                                                                                        |   |         |
| Support:                  |    |                                                                                                                                                                                                                               |   |         |
| Sources                   | 5a | Indicate sources of financial or other support for the review                                                                                                                                                                 | Y | 268-273 |
| Sponsor                   | 5b | Provide name for the review funder and/or sponsor                                                                                                                                                                             | Y | 301-306 |
| Role of sponsor or funder | 5c | Describe roles of funder(s), sponsor(s), and/or institution(s), if any, in developing the protocol                                                                                                                            | Y | 307     |
| <b>INTRODUCTION</b>       |    |                                                                                                                                                                                                                               |   |         |
| Rationale                 | 6  | Describe the rationale for the review in the context of what is already known                                                                                                                                                 | Y | 63-98   |
| Objectives                | 7  | Provide an explicit statement of the question(s) the review will address with reference to participants, interventions, comparators, and outcomes (PICO)                                                                      | Y | 100-126 |
| <b>METHODS</b>            |    |                                                                                                                                                                                                                               |   |         |
| Eligibility criteria      | 8  | Specify the study characteristics (such as PICO, study design, setting, time frame) and report characteristics (such as years considered, language, publication status) to be used as criteria for eligibility for the review | Y | 141-156 |
| Information sources       | 9  | Describe all intended information sources (such as electronic databases, contact with study authors, trial registers or other grey literature sources) with planned dates of coverage                                         | Y | 166-169 |
| Search strategy           | 10 | Present draft of search strategy to be used for at least one electronic database, including planned limits, such that it could be repeated                                                                                    | Y | 169-174 |
| Study records:            |    |                                                                                                                                                                                                                               |   |         |

|    |                                    |     |                                                                                                                                                                                                                                                  |           |
|----|------------------------------------|-----|--------------------------------------------------------------------------------------------------------------------------------------------------------------------------------------------------------------------------------------------------|-----------|
| 1  |                                    |     |                                                                                                                                                                                                                                                  |           |
| 2  |                                    |     |                                                                                                                                                                                                                                                  |           |
| 3  |                                    |     |                                                                                                                                                                                                                                                  |           |
| 4  | Data management                    | 11a | Describe the mechanism(s) that will be used to manage records and data throughout the review                                                                                                                                                     | Y 186-190 |
| 5  |                                    |     |                                                                                                                                                                                                                                                  |           |
| 6  | Selection process                  | 11b | State the process that will be used for selecting studies (such as two independent reviewers) through each phase of the review (that is, screening, eligibility and inclusion in meta-analysis)                                                  | Y 187-194 |
| 7  |                                    |     |                                                                                                                                                                                                                                                  |           |
| 8  |                                    |     |                                                                                                                                                                                                                                                  |           |
| 9  |                                    |     |                                                                                                                                                                                                                                                  |           |
| 10 |                                    |     |                                                                                                                                                                                                                                                  |           |
| 11 | Data collection process            | 11c | Describe planned method of extracting data from reports (such as piloting forms, done independently, in duplicate), any processes for obtaining and confirming data from investigators                                                           | Y 202-210 |
| 12 |                                    |     |                                                                                                                                                                                                                                                  |           |
| 13 |                                    |     |                                                                                                                                                                                                                                                  |           |
| 14 |                                    |     |                                                                                                                                                                                                                                                  |           |
| 15 | Data items                         | 12  | List and define all variables for which data will be sought (such as PICO items, funding sources), any pre-planned data assumptions and simplifications                                                                                          | Y 203-206 |
| 16 |                                    |     |                                                                                                                                                                                                                                                  |           |
| 17 |                                    |     |                                                                                                                                                                                                                                                  |           |
| 18 |                                    |     |                                                                                                                                                                                                                                                  |           |
| 19 | Outcomes and prioritization        | 13  | List and define all outcomes for which data will be sought, including prioritization of main and additional outcomes, with rationale                                                                                                             | Y 220-228 |
| 20 |                                    |     |                                                                                                                                                                                                                                                  |           |
| 21 |                                    |     |                                                                                                                                                                                                                                                  |           |
| 22 |                                    |     |                                                                                                                                                                                                                                                  |           |
| 23 | Risk of bias in individual studies | 14  | Describe anticipated methods for assessing risk of bias of individual studies, including whether this will be done at the outcome or study level, or both; state how this information will be used in data synthesis                             | Y 231-235 |
| 24 |                                    |     |                                                                                                                                                                                                                                                  |           |
| 25 |                                    |     |                                                                                                                                                                                                                                                  |           |
| 26 |                                    |     |                                                                                                                                                                                                                                                  |           |
| 27 |                                    |     |                                                                                                                                                                                                                                                  |           |
| 28 | Data synthesis                     | 15a | Describe criteria under which study data will be quantitatively synthesised                                                                                                                                                                      | Y 254-266 |
| 29 |                                    |     |                                                                                                                                                                                                                                                  |           |
| 30 |                                    | 15b | If data are appropriate for quantitative synthesis, describe planned summary measures, methods of handling data and methods of combining data from studies, including any planned exploration of consistency (such as $I^2$ , Kendall's $\tau$ ) | Y 258-266 |
| 31 |                                    |     |                                                                                                                                                                                                                                                  |           |
| 32 |                                    |     |                                                                                                                                                                                                                                                  |           |
| 33 |                                    |     |                                                                                                                                                                                                                                                  |           |
| 34 |                                    |     |                                                                                                                                                                                                                                                  |           |
| 35 |                                    | 15c | Describe any proposed additional analyses (such as sensitivity or subgroup analyses, meta-regression)                                                                                                                                            | Y 260-264 |
| 36 |                                    |     |                                                                                                                                                                                                                                                  |           |
| 37 |                                    |     |                                                                                                                                                                                                                                                  |           |
| 38 |                                    |     |                                                                                                                                                                                                                                                  |           |
| 39 |                                    | 15d | If quantitative synthesis is not appropriate, describe the type of summary planned                                                                                                                                                               | Y 238-251 |
| 40 |                                    |     |                                                                                                                                                                                                                                                  |           |
| 41 |                                    |     |                                                                                                                                                                                                                                                  |           |
| 42 |                                    |     |                                                                                                                                                                                                                                                  |           |
| 43 |                                    |     |                                                                                                                                                                                                                                                  |           |
| 44 |                                    |     |                                                                                                                                                                                                                                                  |           |
| 45 |                                    |     |                                                                                                                                                                                                                                                  |           |
| 46 |                                    |     |                                                                                                                                                                                                                                                  |           |

1  
2  
3  
4  
5  
6  
7  
8  
9  
10  
11  
12  
13  
14  
15  
16  
17  
18  
19  
20  
21  
22  
23  
24  
25  
26  
27  
28  
29  
30  
31  
32  
33  
34  
35  
36  
37  
38  
39  
40  
41  
42  
43  
44  
45  
46

|                                   |    |                                                                                                                               |   |         |
|-----------------------------------|----|-------------------------------------------------------------------------------------------------------------------------------|---|---------|
| Meta-bias(es)                     | 16 | Specify any planned assessment of meta-bias(es) (such as publication bias across studies, selective reporting within studies) | Y | 265-266 |
| Confidence in cumulative evidence | 17 | Describe how the strength of the body of evidence will be assessed (such as GRADE)                                            | Y | 231-235 |

**\* The copyright for PRISMA-P (including checklist) is held by the PRISMA-P Group and is distributed under a Creative Commons Attribution Licence 4.0.**

*From: Shamseer L, Moher D, Clarke M, Ghersi D, Liberati A, Petticrew M, Shekelle P, Stewart L, PRISMA-P Group. Preferred reporting items for systematic review and meta-analysis protocols (PRISMA-P) 2015: elaboration and explanation. BMJ. 2015 Jan 2;349(jan02 1):g7647.*
